# Supplementary material for: Stochastic Compositional Optimization with Compositional Constraints
Source: Atypon-hosted journal article supplement (doi:10.1287/ijoo.2023.0024), 2025-06-12
Supplement: ijoo.2023.0024.sm1.pdf [file ijoo.2023.0024.sm1.pdf]

# E-companion: “Stochastic Compositional Optimization with Compositional Constraints”

## EC.1 Proof of Results in Section 2

Letting Assumptions 1, 2, and 3 hold and letting  $(x^*, \lambda, \pi_{1:2}, v) \in \mathcal{X} \times \mathbb{R}_+^m \times \Pi \times \mathcal{V}$  be a general feasible point, we first introduce two technical lemmas to facilitate our analysis.

**Lemma EC.1 (Lemma 3.8 of Lan (2020))** *Assume function  $g$  is  $\mu$ -strongly convex with respect to some Bergman distance  $V$ , i.e.,  $g(y) - g(\bar{y}) - g'(\bar{y})^\top (y - \bar{y}) \geq \mu V(y, \bar{y})$ . If  $\hat{y} \in \operatorname{argmin}_{y \in Y} \{\pi^\top y + g(y) + \tau V(y, \bar{y})\}$ , then*

$$(\hat{y} - y)^\top \pi + g(\hat{y}) - g(y) \leq \tau V(y, \bar{y}) - (\tau + \mu)V(y, \hat{y}) - \tau V(\hat{y}, \bar{y}).$$

### EC.1.1 Proof of Theorem 1

*Proof:* Recall that  $\mathcal{L}(x, \pi_{1:2}, v, \lambda) = \mathcal{L}_F(x, \pi_{1:2}) + \lambda^\top \mathcal{L}_g(x, v)$  for any  $(x, \lambda, \pi_{1:2}, v) \in \mathcal{X} \times \mathbb{R}_+^m \times \Pi \times \mathcal{V}$ , we consider  $Q(z_t, z)$  and decompose it as

$$\begin{aligned} Q(z_t, z) &= \mathcal{L}(x_t, \lambda, \pi_{1:2}, v) - \mathcal{L}(x^*, \lambda_t, \pi_{1:2,t}, v_t) \\ &= \mathcal{L}_F(x_t, \pi_{1:2}) - \mathcal{L}_F(x^*, \pi_{1:2,t}) + \lambda^\top \mathcal{L}_g(x_t, v) - \lambda_t^\top \mathcal{L}_g(x^*, v_t) \\ &= \mathcal{L}_F(x_t, \pi_{1:2}) - \mathcal{L}_F(x^*, \pi_{1:2,t}) + \lambda^\top \left( \mathcal{L}_g(x_t, v) - \mathcal{L}_g(x_t, v_t) \right) \\ &\quad + \lambda_t^\top \left( \mathcal{L}_g(x_t, v_t) - \mathcal{L}_g(x^*, v_t) \right) + (\lambda - \lambda_t)^\top \mathcal{L}_g(x_t, v_t) \\ &= \mathcal{L}_F(x_t, \pi_{1:2}) - \mathcal{L}_F(x_t, \pi_{1:2,t}) + \mathcal{L}_F(x_t, \pi_{1:2,t}) - \mathcal{L}_F(x^*, \pi_{1:2,t}) \\ &\quad + \lambda^\top \left( \mathcal{L}_g(x_t, v) - \mathcal{L}_g(x_t, v_t) \right) + \lambda_t^\top \left( \mathcal{L}_g(x_t, v_t) - \mathcal{L}_g(x^*, v_t) \right) + (\lambda - \lambda_t)^\top \mathcal{L}_g(x_t, v_t). \end{aligned} \tag{EC.1}$$

We then provide bounds for the terms above in expectation. First, by Lemma EC.3 in Appendix Section EC.1.2, we have

$$\begin{aligned} &\sum_{t=1}^K \mathbb{E} \left[ \mathcal{L}_F(x_t, \pi_{1:2}) - \mathcal{L}_F(x_t, \pi_{1:2,t}) \right] \\ &\leq \frac{40KC_{f_1}^2 C_{f_2}^2}{\eta_0} + \sum_{t=1}^K \frac{\eta_{t-1}}{10} \mathbb{E}[\|x_t - x_{t-1}\|^2] + \sqrt{K} L_{f_1} \sigma_{f_2}^2 + 3\sqrt{K} C_{f_1} \sigma_{f_2}. \end{aligned} \tag{EC.2}$$

Secondly, by Lemma EC.4 in Appendix Section EC.1.3, we obtain that

$$\begin{aligned} &\sum_{t=1}^K \mathbb{E} \left[ \mathcal{L}_F(x_t, \pi_{1:2,t}) - \mathcal{L}_F(x^*, \pi_{1:2,t}) + \lambda_t^\top \left( \mathcal{L}_g(x_t, v_t) - \mathcal{L}_g(x^*, v_t) \right) \right] \\ &\leq \frac{\eta}{2} \|x_0 - x^*\|^2 + \sum_{t=1}^K \left( \frac{5C_{f_1}^2 C_{f_2}^2}{2\eta} - \frac{3\eta}{10} \mathbb{E}[\|x_{t-1} - x_t\|^2] \right) \\ &\quad + \sum_{t=1}^K \left( \frac{\alpha}{4} \mathbb{E}[\|\lambda_t - \lambda_{t-1}\|^2] + \frac{D_X^2 C_g^2}{\alpha} + \frac{5\mathbb{E}[\|\lambda_{t-1}\|^2] C_g^2}{2\eta} \right). \end{aligned} \tag{EC.3}$$

Thirdly, by Lemma EC.5 in Appendix Section EC.1.4 and the condition that  $\|\lambda\| \leq M_\lambda$ , we obtain

$$\mathbb{E} \left[ \sum_{t=1}^K \lambda^\top (\mathcal{L}_g(x_t, v) - \mathcal{L}_g(x_t, v_t)) \right] \leq \sum_{t=1}^K \frac{10C_g^2 M_\lambda^2}{\eta} + \frac{\eta \mathbb{E}[\|x_t - x_{t-1}\|^2]}{10}. \quad (\text{EC.4})$$

Finally, by Lemma EC.6 in Appendix Section EC.1.5, we obtain that

$$\begin{aligned} & \mathbb{E} \left[ \sum_{t=1}^K (\lambda - \lambda_t)^\top \mathcal{L}_g(x_t, v_t) \right] + \frac{\alpha}{2} \mathbb{E}[\|\lambda_K - \lambda\|^2] \\ & \leq \sqrt{K} M_\lambda \sigma_g + \sum_{t=1}^K \left( \frac{5C_g^2 \mathbb{E}[\|\lambda - \lambda_t\|^2]}{2\eta} + \frac{\eta}{10} \mathbb{E}[\|x_{t-1} - x_t\|^2] - \frac{\alpha}{4} \mathbb{E}[\|\lambda_{t-1} - \lambda_t\|^2] \right) \\ & \quad + \frac{\alpha}{2} \mathbb{E}[\|\lambda_0 - \lambda\|^2] + \frac{K\sigma_g^2}{\alpha}. \end{aligned} \quad (\text{EC.5})$$

Summing (EC.1) over  $t = 1, 2, \dots, K$ , taking expectations, and combining (EC.2), (EC.3), (EC.4), and (EC.5), we conclude that

$$\begin{aligned} & \sum_{t=1}^K \mathbb{E} \left( \mathcal{L}(x_t, \lambda, \pi_{1:2}, v) - \mathcal{L}(x^*, \lambda_t, \pi_{1:2,t}, v_t) \right) + \frac{\alpha}{2} \mathbb{E}[\|\lambda_K - \lambda\|^2] \\ & \leq \frac{95KC_{f_1}^2 C_{f_2}^2}{2\eta} + \sqrt{K} L_{f_1} \sigma_{f_2}^2 + 3\sqrt{K} C_{f_1} \sigma_{f_2} + \frac{\eta}{2} \|x_0 - x^*\|^2 + \frac{K}{\alpha} D_X^2 C_g^2 + \sqrt{K} M_\lambda \sigma_g \\ & \quad + \frac{\alpha}{2} \mathbb{E}[\|\lambda_0 - \lambda\|^2] + \frac{K\sigma_g^2}{\alpha} + \sum_{t=1}^K \left( \frac{5C_g^2 \mathbb{E}[\|\lambda_{t-1}\|^2]}{2\eta} + \frac{10C_g^2 M_\lambda^2}{\eta} + \frac{5C_g^2 \mathbb{E}[\|\lambda - \lambda_t\|^2]}{2\eta} \right), \end{aligned}$$

which completes the proof. ■

**Lemma EC.2 (Lemma 2 of Zhang and Lan (2024))** *Let  $\mathcal{F}_t$  be a filtration and  $\{\delta_t\}_{t=1}^N$  be a martingale noise sequence such that  $\delta_j \in \mathcal{F}_{t+1}$  for  $j = 1, 2, \dots, t$ ,  $\mathbb{E}[\delta_t | \mathcal{F}_t] = 0$ , and  $\mathbb{E}[\|\delta_t\|^2 | \mathcal{F}_t] \leq \sigma^2$ . For any random variable  $\pi \in \Pi$  correlated with  $\{\delta_t\}_{t=1}^N$ , suppose it is bounded such that  $\|\pi\| \leq M_\pi$  uniformly, then*

$$\mathbb{E} \left[ \sum_{t=1}^N \hat{\pi}^\top \delta_t \right] \leq \sqrt{N} M_\pi \sigma.$$

## EC.1.2 Lemma EC.3 and Its Proof

**Lemma EC.3** *Suppose Assumptions 1, 2 and 3 hold, and Algorithm 1 generates  $\{(x_t, \lambda_t, \pi_{1:2,t}, v_t)\}_{t=1}^N$  by setting  $\tau_t = t/2$  and  $\eta_t = \eta$  for  $t = 0, 1, \dots, N$ . Then for any integer  $K \leq N$ , we have*

$$\begin{aligned} & \sum_{t=1}^K \mathbb{E} \left[ \mathcal{L}_F(x_t, \pi_{1:2}) - \mathcal{L}_F(x_t, \pi_{1:2,t}) \right] \\ & \leq \sum_{t=1}^K \frac{\eta_{t-1}}{10} \mathbb{E}[\|x_t - x_{t-1}\|^2] + \frac{40KC_{f_1}^2 C_{f_2}^2}{\eta} + 2\sqrt{K} L_{f_1} \sigma_{f_2}^2 + 3\sqrt{K} C_{f_1} \sigma_{f_2}. \end{aligned}$$

*Proof:* This result can be derived by combining Propositions 5 and 6 of ?. Here we provide the proof sketch. By decomposing  $\mathcal{L}_F(x_t, \pi_{1:2}) - \mathcal{L}_F(x_t, \pi_{1:2,t})$ , we have

$$\begin{aligned} & \mathcal{L}_F(x_t, \pi_{1:2}) - \mathcal{L}_F(x_t, \pi_{1:2,t}) \\ &= \mathcal{L}_{f_1}(x_t, \pi_1, \pi_2) - \mathcal{L}_{f_1}(x_t, \pi_1, \pi_{2,t}) + \mathcal{L}_{f_1}(x_t, \pi_1, \pi_{2,t}) - \mathcal{L}_{f_1}(x_t, \pi_{1,t}, \pi_{2,t}). \end{aligned}$$

We provide bound for each term after the above decomposition. First, we consider  $\mathcal{L}_{f_1}(x_t, \pi_1, \pi_2) - \mathcal{L}_{f_1}(x_t, \pi_1, \pi_{2,t})$  and obtain

$$\begin{aligned} & \sum_{t=1}^K \mathbb{E} \left( \mathcal{L}_{f_1}(x_t, \pi_1, \pi_2) - \mathcal{L}_{f_1}(x_t, \pi_1, \pi_{2,t}) \right) = \sum_{t=1}^K \mathbb{E} \left[ \left\langle \mathcal{L}_{f_2}(x_t, \pi_2) - \mathcal{L}_{f_2}(x_t, \pi_{2,t}), \pi_1 \right\rangle \right] \\ &= \sum_{t=1}^K \mathbb{E} \left[ \left\langle (\pi_2 - \pi_{2,t})^\top x_t - f_2^*(\pi_2) + f_2^*(\pi_{2,t}), \pi_1 \right\rangle \right] \\ &= \sum_{t=1}^K \mathbb{E} \left[ \left\langle (\pi_2 - \pi_{2,t})^\top x_{t-1} - f_2^*(\pi_2) + f_2^*(\pi_{2,t}), \pi_1 \right\rangle \right] \\ &+ \sum_{t=1}^K \mathbb{E} \left[ \left\langle (\pi_2 - \pi_{2,t})^\top (x_t - x_{t-1}), \pi_1 \right\rangle \right], \end{aligned}$$

By recalling (13) that  $\pi_{2,t} \in \operatorname{argmax}_{\pi_2 \in \Pi_2} \{ \langle \pi_2, x_{t-1} \rangle - f_2^*(\pi_2) \}$  and using Assumptions 3 that  $\pi_1 \geq 0$  for non-affine  $f_2$ , we obtain for both affine ( $\pi_2$  is a constant) and non-affine  $f_2$ ,

$$\mathbb{E} \left[ \left\langle (\pi_2 - \pi_{2,t})^\top x_{t-1} - f_2^*(\pi_2) + f_2^*(\pi_{2,t}), \pi_1 \right\rangle \right] \leq 0,$$

which further implies that

$$\begin{aligned} & \sum_{t=1}^K \mathbb{E} \left( \mathcal{L}_{f_1}(x_t, \pi_1, \pi_2) - \mathcal{L}_{f_1}(x_t, \pi_1, \pi_{2,t}) \right) \leq \sum_{t=1}^K \mathbb{E} \left[ \left\langle (\pi_2 - \pi_{2,t}) \pi_1, x_t - x_{t-1} \right\rangle \right] \\ & \leq \sum_{t=1}^K \left[ \frac{5 \mathbb{E} [\|(\pi_2 - \pi_{2,t}) \pi_1\|^2]}{\eta} + \frac{\eta}{20} \mathbb{E} [\|x_t - x_{t-1}\|^2] \right] \tag{EC.6} \\ & \leq \sum_{t=1}^K \left[ \frac{20 C_{f_1}^2 C_{f_2}^2}{\eta} + \frac{\eta}{20} \mathbb{E} [\|x_t - x_{t-1}\|^2] \right]. \end{aligned}$$

The next part is similar to Proposition 6 of ?. Consider the following decomposition:

$$\begin{aligned} & \mathbb{E} [\mathcal{L}_{f_1}(x_t, \pi_1, \pi_{2,t}) - \mathcal{L}_{f_1}(x_t, \pi_{1,t}, \pi_{2,t})] = \mathbb{E} [\langle \pi_1 - \pi_{1,t}, f_2(x_t) \rangle - \{f_1^*(\pi_1) - f_1^*(\pi_{1,t})\}] \\ &= \mathbb{E} [\langle \pi_1 - \pi_{1,t}, f_2(x_{t-1}, \xi_{2,t}^1) \rangle - \{f_1^*(\pi_1) - f_1^*(\pi_{1,t})\}] \\ &+ \mathbb{E} [\langle \pi_{1,t} - \pi_{1,t-1}, f_2(x_{t-1}) - f_2(x_{t-1}, \xi_{2,t}^1) \rangle] + \mathbb{E} [\langle \pi_1 - \pi_{1,t}, f_2(x_t) - f_2(x_{t-1}) \rangle] \tag{EC.7} \\ &+ \mathbb{E} [\langle \pi_1, f_2(x_{t-1}) - f_2(x_{t-1}, \xi_{2,t}^t) \rangle] + \underbrace{\mathbb{E} [\langle \pi_{1,t-1}, f_2(x_{t-1}) - f_2(x_{t-1}, \xi_{2,t}^1) \rangle]}_{=0}. \end{aligned}$$

Among these terms, the update rule of  $\pi_{1,t}$ , the strong convexity of  $f_1^*$  with respect to  $D_{f_1^*}$ , and the choice of  $\tau_t$  imply

$$\begin{aligned} & \mathbb{E}\left[\sum_{t=1}^K \left\langle \pi_1 - \pi_{1,t}, f_2(x_{t-1}, \xi_{2,t}^1) \right\rangle - \{f_1^*(\pi_1) - f_1^*(\pi_{1,t})\}\right] \\ & \leq \mathbb{E}\left[\sum_{t=1}^K \tau_t D_{f_1^*}(\pi_1; \pi_{1,t-1}) - (\tau_t + 1) D_{f_1^*}(\pi_1; \pi_{1,t-1}) - \tau_t D_{f_1^*}(\pi_{1,t}; \pi_{1,t-1})\right] \\ & \leq -\mathbb{E}\left[\sum_{t=1}^K \tau_t D_{f_1^*}(\pi_{1,t}; \pi_{1,t-1})\right]. \end{aligned}$$

The  $1/L_{f_1}$ -strong convexity of  $D_{f_1^*}$ , the choice of  $\tau_t$  and the Cauchy-Schwartz inequality imply

$$\begin{aligned} & \mathbb{E}\sum_{t=1}^K \left[ (\pi_{1,t} - \pi_{1,t-1})(f_2(x_{t-1}, \xi_{2,t}^1) - f_2(x_{t-1})) - \tau_t D_{f_1^*}(\pi_{1,t}; \pi_{1,t-1}) \right] \\ & \leq \sum_{t=2}^K \frac{L_{f_1} \sigma_{f_2}^2}{\tau_t} + \sqrt{\mathbb{E}\|\pi_{1,1} - \pi_{1,0}\|^2} \sqrt{\mathbb{E}\|f_2(x_0, \xi_{2,0}^1) - f_2(x_0)\|^2} \\ & \leq 2L_{f_1} \sigma_{f_2}^2 \log K + 2C_{f_1} \sigma_{f_2} \\ & \leq 2\sqrt{K} L_{f_1} \sigma_{f_2}^2 + 2\sqrt{K} C_{f_1} \sigma_{f_2}. \end{aligned}$$

Lemma 2 of ? implies that

$$\mathbb{E}\left[\sum_{t=1}^K \left\langle \pi_1, f_2(x_{t-1}) - f_2(x_{t-1}, \xi_{2,t}^t) \right\rangle\right] \leq \sqrt{K} C_{f_1} \sigma_{f_2}.$$

Similar to (EC.6), we also have

$$\mathbb{E}\left[\sum_{t=1}^K \left\langle \pi_1 - \pi_{1,t}, f_2(x_t) - f_2(x_{t-1}) \right\rangle\right] \leq \sum_{t=1}^K \left[ \frac{20C_{f_1}^2 C_{f_2}^2}{\eta} + \frac{\eta}{20} \mathbb{E}\|x_t - x_{t-1}\|^2 \right].$$

Combining them with the decomposition in (EC.7), we obtain

$$\begin{aligned} & \sum_{t=1}^K \mathbb{E}\left(\mathcal{L}_{f_1}(x_t, \pi_1, \pi_{2,t}) - \mathcal{L}_{f_1}(x_t, \pi_{1,t}, \pi_{2,t})\right) \\ & \leq \sum_{t=1}^K \left[ \frac{20C_{f_1}^2 C_{f_2}^2}{\eta} + \frac{\eta}{20} \mathbb{E}\|x_t - x_{t-1}\|^2 \right] + 2\sqrt{K} L_{f_1} \sigma_{f_2}^2 + 3\sqrt{K} C_{f_1} \sigma_{f_2}. \end{aligned}$$

The desired result then follows from adding to preceding inequality to (EC.6). ■

### EC.1.3 Lemma EC.4 and Its Proof

**Lemma EC.4** Suppose Assumptions 1, 2, and 3 hold, and Algorithm 1 generates  $\{(x_t, \lambda_t, \pi_{1:2,t}, v_t)\}_{t=1}^N$  by setting  $\tau_t = t/2$ ,  $\alpha_t = \alpha$ , and  $\eta_t = \eta$  for all  $0 \leq t \leq N$ . We have

$$\begin{aligned} & \sum_{t=1}^K \mathbb{E} \left[ \mathcal{L}_F(x_t, \pi_{1:2,t}) - \mathcal{L}_F(x^*, \pi_{1:2,t}) + \lambda_t^\top (\mathcal{L}_g(x_t, v_t) - \mathcal{L}_g(x^*, v_t)) \right] \\ & \leq \frac{\eta}{2} \mathbb{E}[\|x_{t-1} - x^*\|^2] - \sum_{t=1}^K \frac{3\eta}{10} \mathbb{E}[\|x_{t-1} - x_t\|^2] + \sum_{t=1}^K \frac{5C_{f_1}^2 C_{f_2}^2}{2\eta} \\ & \quad + \sum_{t=1}^K \frac{\alpha}{4} \mathbb{E}[\|\lambda_t - \lambda_{t-1}\|^2] + \sum_{t=1}^K \frac{1}{\alpha} D_X^2 C_g^2 + \sum_{t=1}^K \frac{5\mathbb{E}[\|\lambda_{t-1}\|^2] C_g^2}{2\eta}. \end{aligned}$$

*Proof.* Recall Algorithm 1, for  $t = 1, 2, \dots, K$ , we note that  $\pi_{2,t}\pi_{1,t}, v_t\lambda_t \in \mathbb{R}^{d_x}$  and obtain

$$\begin{aligned} & \mathcal{L}_F(x_t, \pi_{1:2,t}) - \mathcal{L}_F(x^*, \pi_{1:2,t}) + \lambda_t^\top (\mathcal{L}_g(x_t, v_t) - \mathcal{L}_g(x^*, v_t)) \\ & = \langle \pi_{2,t}\pi_{1,t}, x_t - x^* \rangle + \langle v_t\lambda_t, x_t - x^* \rangle \\ & = \langle \pi_{2,t}^0\pi_{1,t}^0, x_t - x^* \rangle + \langle v_t^0\lambda_{t-1}, x_t - x^* \rangle \\ & \quad + \langle \pi_{2,t}\pi_{1,t} - \pi_{2,t}^0\pi_{1,t}^0, x_t - x^* \rangle + \langle v_t\lambda_t - v_t^0\lambda_{t-1}, x_t - x^* \rangle, \end{aligned}$$

and

$$x_t = \operatorname{argmin}_{x \in \mathcal{X}} \left\{ \langle \pi_{2,t}^0\pi_{1,t}^0 + v_t^0\lambda_{t-1}, x \rangle + \frac{\eta_{t-1}}{2} \|x_{t-1} - x\|^2 \right\}.$$

By applying Lemma EC.1 to the above update rule, since  $x^* \in \mathcal{X}$ , we have

$$\langle \pi_{2,t}^0\pi_{1,t}^0 + v_t^0\lambda_{t-1}, x_t - x^* \rangle \leq \frac{\eta}{2} \|x_{t-1} - x^*\|^2 - \frac{\eta}{2} \|x_{t-1} - x_t\|^2 - \frac{\eta}{2} \|x_t - x^*\|^2,$$

which further yields

$$\begin{aligned} & \mathcal{L}_F(x_t, \pi_{1:2,t}) - \mathcal{L}_F(x^*, \pi_{1:2,t}) + \lambda_t^\top (\mathcal{L}_g(x_t, v_t) - \mathcal{L}_g(x^*, v_t)) \\ & \leq \frac{\eta}{2} \|x_{t-1} - x^*\|^2 - \frac{\eta}{2} \|x_{t-1} - x_t\|^2 - \frac{\eta}{2} \|x_t - x^*\|^2 \\ & \quad + \underbrace{\langle \pi_{2,t}\pi_{1,t} - \pi_{2,t}^0\pi_{1,t}^0, x_t - x^* \rangle}_{\Delta_0^t} + \underbrace{\langle v_t\lambda_t - v_t^0\lambda_{t-1}, x_t - x^* \rangle}_{\Lambda_0^t}. \end{aligned} \tag{EC.8}$$

Then, we decompose  $\Delta_0^t$  by

$$\Delta_0^t = (\pi_{2,t}\pi_{1,t} - \pi_{2,t}^0\pi_{1,t}^0)(x_{t-1} - x^*) + (\pi_{2,t}\pi_{1,t} - \pi_{2,t}^0\pi_{1,t}^0)(x_t - x_{t-1}).$$

We note that given  $x_{t-1}, y_t$ ,

$$\mathbb{E}[\pi_{2,t}\pi_{1,t} - \pi_{2,t}^0\pi_{1,t}^0 | x_{t-1}, y_t] = 0,$$

and

$$\begin{aligned} & \mathbb{E}[\|\pi_{2,t}\pi_{1,t} - \pi_{2,t}^0\pi_{1,t}^0\|^2 | x_{t-1}, y_t] \\ & \leq \mathbb{E}[\|\pi_{1,t} - \pi_{1,t}^0\|^2 | x_{t-1}, y_t] \mathbb{E}[\|\pi_{2,t}\|^2 | x_{t-1}] + \mathbb{E}[\|(\pi_{2,t}^0 - \pi_{2,t})\pi_{1,t}\|^2 | x_{t-1}, y_t] \\ & \leq 2C_{f_1}^2 C_{f_2}^2. \end{aligned}$$

By the independence between  $(x_{t-1} - x^*)$  and the mean-zero term  $(\pi_{2,t}\pi_{1,t} - \pi_{2,t}^0\pi_{1,t}^0)$ , we have  $\mathbb{E}\left[\left(\pi_{2,t}\pi_{1,t} - \pi_{2,t}^0\pi_{1,t}^0\right)^\top (x_{t-1} - x^*)\right] = 0$ . Moreover, to handle the possible correlation between  $(x_t - x_{t-1})$  and  $(\pi_{2,t}\pi_{1,t} - \pi_{2,t}^0\pi_{1,t}^0)$ , we utilize the fact that  $ab \leq \frac{5a^2}{2} + \frac{b^2}{10}$  for all  $a, b \in \mathbb{R}$ , and obtain

$$\begin{aligned}\mathbb{E}\left[\sum_{t=1}^K \Delta_0^t\right] &= \mathbb{E}\left[\sum_{t=1}^K \left\langle \pi_{2,t}\pi_{1,t} - \pi_{2,t}^0\pi_{1,t}^0, x_t - x_{t-1} \right\rangle\right] \\ &\leq \sum_{t=1}^K \left( \frac{5C_{f_1}^2 C_{f_2}^2}{2\eta} + \frac{\eta \mathbb{E}[\|x_t - x_{t-1}\|^2]}{10} \right).\end{aligned}\tag{EC.9}$$

We then decompose  $\Lambda_0^t$  as

$$\Lambda_0^t = \underbrace{\langle v_t(\lambda_t - \lambda_{t-1}), x_t - x^* \rangle}_{\Lambda_1^t} + \underbrace{\langle (v_t - v_t^0)\lambda_{t-1}, x_t - x^* \rangle}_{\Lambda_2^t}.$$

By the fact that  $2ab \leq a^2 + b^2$  and Assumptions 1 and 2 that  $\|x_t - x^*\| \leq D_X$  and  $\|v_t\| \leq C_g$ , for any  $\alpha > 0$ , we have

$$\begin{aligned}\mathbb{E}[\Lambda_1^t] &\leq \frac{\alpha}{4} \mathbb{E}[\|\lambda_t - \lambda_{t-1}\|^2] + \frac{1}{\alpha} \mathbb{E}[\|v_t^\top (x_t - x^*)\|^2] \\ &\leq \frac{\alpha}{4} \mathbb{E}[\|\lambda_t - \lambda_{t-1}\|^2] + \frac{1}{\alpha} D_X^2 C_g^2.\end{aligned}\tag{EC.10}$$

Meanwhile, since  $\mathbb{E}[v_t - v_t^0] = 0$  and  $\mathbb{E}[\|v_t - v_t^0\|^2] \leq C_g^2$ , we obtain

$$\begin{aligned}\mathbb{E}\left[\sum_{t=1}^K \Lambda_2^t\right] &= \mathbb{E}\left[\sum_{t=1}^K \left\langle (v_t - v_t^0)\lambda_{t-1}, x_{t-1} - x^* \right\rangle\right] + \mathbb{E}\left[\sum_{t=1}^K \left\langle (v_t - v_t^0)\lambda_{t-1}, x_t - x_{t-1} \right\rangle\right] \\ &= \sum_{t=1}^K \mathbb{E}\left[\left\langle (v_t - v_t^0)\lambda_{t-1}, x_t - x_{t-1} \right\rangle\right] \\ &\leq \sum_{t=1}^K \mathbb{E}\left[\frac{5\|(v_t - v_t^0)\lambda_{t-1}\|^2}{2\eta}\right] + \sum_{t=1}^K \frac{\eta \mathbb{E}[\|x_t - x_{t-1}\|^2]}{10} \\ &\leq \sum_{t=1}^K \frac{5C_g^2 \mathbb{E}[\|\lambda_{t-1}\|^2]}{2\eta} + \sum_{t=1}^K \frac{\eta \mathbb{E}[\|x_t - x_{t-1}\|^2]}{10},\end{aligned}\tag{EC.11}$$

where the second equality holds by the independence between  $(v_t - v_t^0)\lambda_{t-1}$  and  $(x_{t-1} - x^*)$ , and the second last inequality holds due to the fact that  $ab \leq \frac{5a^2}{2} + \frac{b^2}{10}$ . Taking expectations on both sides of (EC.8), summing over  $t = 1, \dots, N$ , and substituting (EC.9), (EC.10), and (EC.11) into it, we obtain

$$\begin{aligned}&\sum_{t=1}^K \mathbb{E}\left[\mathcal{L}_F(x_t, \pi_{1:2,t}) - \mathcal{L}_F(x^*, \pi_{1:2,t}) + \lambda_t^\top \left(\mathcal{L}_g(x_t, v_t) - \mathcal{L}_g(x^*, v_t)\right)\right] \\ &\leq \sum_{t=1}^K \mathbb{E}\left[\frac{\eta}{2} \|x_t - x^*\|^2 - \frac{\eta}{2} \|x_t - x_{t+1}\|^2 - \frac{\eta}{2} \|x_{t+1} - x^*\| + \Delta_0^t + \Lambda_1^t + \Lambda_2^t\right] \\ &\leq \frac{\eta}{2} \mathbb{E}[\|x_{t-1} - x^*\|^2] - \sum_{t=1}^K \frac{3\eta}{10} \mathbb{E}[\|x_{t-1} - x_t\|^2] + \sum_{t=1}^K \frac{5C_{f_1}^2 C_{f_2}^2}{2\eta_{t-1}} \\ &\quad + \sum_{t=1}^K \frac{\alpha}{4} \mathbb{E}[\|\lambda_t - \lambda_{t-1}\|^2] + \sum_{t=1}^K \frac{D_X^2 C_g^2}{\alpha} + \sum_{t=1}^K \frac{5\mathbb{E}[\|\lambda_{t-1}\|^2] C_g^2}{2\eta},\end{aligned}$$

where the last inequality holds by the fact that  $\eta_t = \eta$  for  $t = 1, 2, \dots, N$ . This completes the proof.  $\blacksquare$

#### EC.1.4 Lemma EC.5 and Its Proof

**Lemma EC.5** *Suppose Assumptions 1, 2 and 3 hold, and Algorithm 1 generates  $\{(x_t, \lambda_t, \pi_t, v_t)\}_{t=1}^N$  by setting  $\tau_t = t/2$ ,  $\alpha_t = \alpha$ , and  $\eta_t = \eta$  for all  $0 \leq t \leq N$ . Let  $\lambda \in \mathbb{R}_+^m$  be a nonnegative random variable whose norm is bounded such that  $\|\lambda\| \leq M_\lambda$  uniformly. Then for any  $K \leq N$ , we have*

$$\mathbb{E} \left[ \sum_{t=1}^K \lambda^\top \left( \mathcal{L}_g(x_t, v) - \mathcal{L}_g(x_t, v_t) \right) \right] \leq \frac{10M_\lambda^2 C_g^2}{\eta} + \frac{\eta \mathbb{E}[\|x_t - x_{t-1}\|^2]}{10}.$$

*Proof.* Recall that the update rule is that

$$v_t \in \operatorname{argmax}_{v \in \mathcal{V}} \left\{ \langle v, x_{t-1} \rangle - g^*(v) \right\}.$$

By the fact that  $\lambda \geq 0$ , we have

$$\begin{aligned} & \lambda^\top \left( \mathcal{L}_g(x_t, v) - \mathcal{L}_g(x_t, v_t) \right) \\ &= \lambda^\top \left( (v - v_t)^\top x_{t-1} - (g^*(v) - g^*(v_t)) + (v - v_t)^\top (x_t - x_{t-1}) \right) \\ &\leq \lambda^\top \left( (v - v_t)^\top (x_t - x_{t-1}) \right). \end{aligned}$$

By taking expectations on both sides of the above inequality, we have

$$\begin{aligned} \mathbb{E} \left[ \lambda^\top \left( \mathcal{L}_g(x_t, v) - \mathcal{L}_g(x_t, v_t) \right) \right] &\leq \mathbb{E} \left[ \frac{5\|(v - v_t)\lambda\|^2}{2\eta} + \frac{\eta\|x_t - x_{t-1}\|^2}{10} \right] \\ &\leq \frac{5M_\lambda^2 \mathbb{E}[\|v - v_t\|^2]}{2\eta_{t-1}} + \frac{\eta \mathbb{E}[\|x_t - x_{t-1}\|^2]}{10} \leq \frac{10C_g^2 M_\lambda^2}{\eta} + \frac{\eta \mathbb{E}[\|x_t - x_{t-1}\|^2]}{10}, \end{aligned}$$

where the first inequality uses the fact that  $ab \leq \frac{5a^2}{2} + \frac{b^2}{10}$ , the second inequality holds by the condition that  $\|\lambda\| \leq M_\lambda$ , and the third inequality holds by Assumption 2 that  $\|v - v_t\|^2 \leq 2\|v\|^2 + 2\|v_t\|^2 \leq 4C_g^2$ . Summing the above inequality over  $t = 1, \dots, K$ , we obtain

$$\mathbb{E} \left[ \sum_{t=1}^K \lambda^\top \left( \mathcal{L}_g(x_t, v) - \mathcal{L}_g(x_t, v_t) \right) \right] \leq \frac{10C_g^2 M_\lambda^2}{\eta} + \frac{\eta \mathbb{E}[\|x_t - x_{t-1}\|^2]}{10},$$

which completes the proof.  $\blacksquare$

#### EC.1.5 Lemma EC.6 and Its Proof

**Lemma EC.6** *Suppose Assumptions 1, 2, and 3 hold, and Algorithm 1 generates  $\{(x_t, \lambda_t, \pi_{1:2,t}, v_t)\}_{t=1}^N$  by setting  $\tau_t = t/2$ ,  $\alpha_t = \alpha$ , and  $\eta_t = \eta$  for all  $0 \leq t \leq N$ . Let  $\lambda \in \mathbb{R}_+^m$  be a bounded nonnegative*

random variable such that  $\|\lambda\| \leq M_\lambda$ . For any integer  $K \leq N$ , we have

$$\begin{aligned} & \mathbb{E} \left[ \sum_{t=1}^K (\lambda - \lambda_t)^\top \mathcal{L}_g(x_t, v_t) \right] + \frac{\alpha^{K-1}}{2} \mathbb{E}[\|\lambda_K - \lambda\|^2] \\ & \leq \sqrt{K} M_\lambda \sigma_g + \sum_{t=1}^K \left( \frac{5C_g^2 \mathbb{E}[\|\lambda - \lambda_t\|^2]}{2\eta} + \frac{\eta}{10} \mathbb{E}[\|x_{t-1} - x_t\|^2] - \frac{\alpha}{4} \mathbb{E}[\|\lambda_{t-1} - \lambda_t\|^2] \right) \\ & \quad + \frac{\alpha}{2} \mathbb{E}[\|\lambda_0 - \lambda\|^2] + \frac{K\sigma_g^2}{\alpha}. \end{aligned}$$

*Proof:* By decomposing  $(\lambda - \lambda_t)^\top \mathcal{L}_g(x_t, v_t)$ , we have,

$$\begin{aligned} & (\lambda - \lambda_t)^\top \mathcal{L}_g(x_t, v_t) \\ & = (\lambda - \lambda_t)^\top \left( \mathcal{L}_g(x_t, v_t) - \mathcal{L}_g(x_{t-1}, v_t) \right) + (\lambda - \lambda_t)^\top [\mathcal{L}_g(x_{t-1}, v_t) - g(x_{t-1}, \zeta_{t-1}^1)] \\ & \quad + (\lambda - \lambda_t) g(x_{t-1}, \zeta_{t-1}^1) \\ & = \underbrace{\langle v_t(\lambda - \lambda_t), x_{t-1} - x_t \rangle}_{T_{1,t}} + \underbrace{(\lambda - \lambda_t)^\top [g(x_{t-1}) - g(x_{t-1}, \zeta_{t-1}^1)]}_{T_{2,t}} \\ & \quad + \underbrace{(\lambda - \lambda_t)^\top g(x_{t-1}, \zeta_{t-1}^1)}_{T_{3,t}}. \end{aligned} \tag{EC.12}$$

We provide bounds for  $T_{1,t}$ ,  $T_{2,t}$ , and  $T_{3,t}$  in our analysis.

First, for  $T_{1,t}$ , by using the fact that  $\langle a, b \rangle \leq \frac{5\|a\|^2}{2} + \frac{\|b\|^2}{10}$  and Assumption 2 that  $\|v_t\|^2 \leq C_g^2$ , we obtain

$$\begin{aligned} \mathbb{E}[\langle v_t(\lambda - \lambda_t), x_{t-1} - x_t \rangle] & \leq \frac{5\mathbb{E}[\|v_t(\lambda - \lambda_t)\|^2]}{2\eta} + \frac{\eta\mathbb{E}[\|x_{t-1} - x_t\|^2]}{10} \\ & \leq \frac{5C_g^2\mathbb{E}[\|\lambda - \lambda_t\|^2]}{2\eta} + \frac{\eta\mathbb{E}[\|x_{t-1} - x_t\|^2]}{10}. \end{aligned} \tag{EC.13}$$

Second, consider  $T_{2,t}$ , by the independence between  $\lambda_{t-1}$  and the fact that  $\mathbb{E}[g(x_{t-1}) - g(x_{t-1}, \zeta_{t-1}^1)] = 0$ , we have

$$\mathbb{E}[\lambda_{t-1}^\top (g(x_{t-1}) - g(x_{t-1}, \zeta_{t-1}^1))] = 0,$$

which further implies that

$$\begin{aligned} \mathbb{E}[T_{2,t}] & = \mathbb{E} \left[ (\lambda - \lambda_{t-1})^\top [g(x_{t-1}) - g(x_{t-1}, \zeta_{t-1}^1)] \right] \\ & \quad + \mathbb{E} \left[ (\lambda_{t-1} - \lambda_t)^\top [g(x_{t-1}) - g(x_{t-1}, \zeta_{t-1}^1)] \right] \\ & = \mathbb{E} \left[ \lambda^\top [g(x_{t-1}) - g(x_{t-1}, \zeta_{t-1}^1)] \right] + \mathbb{E} \left[ (\lambda_{t-1} - \lambda_t)^\top [g(x_{t-1}) - g(x_{t-1}, \zeta_{t-1}^1)] \right]. \end{aligned} \tag{EC.14}$$

Recall that  $\lambda$  is random but bounded such that  $\|\lambda\| \leq M_\lambda$ , by Lemma EC.2 and Assumption 2 that  $\mathbb{E}[\|g(x_{t-1}) - g(x_{t-1}, \zeta_{t-1}^1)\|^2] \leq \sigma_g^2$ , we obtain

$$\mathbb{E} \left[ \sum_{t=1}^K \lambda^\top \left( g(x_{t-1}) - g(x_{t-1}, \zeta_{t-1}^1) \right) \right] \leq \sqrt{K} M_\lambda \sigma_g. \tag{EC.15}$$

Meanwhile, by the fact that  $\langle a, b \rangle \leq \frac{\alpha \|a\|^2}{4} + \frac{\|b\|^2}{\alpha}$  for  $\alpha > 0$ , we bound the second term within the right side of (EC.14) by

$$\begin{aligned} & \mathbb{E} \left[ (\lambda_{t-1} - \lambda_t)^\top [g(x_{t-1}) - g(x_{t-1}, \zeta_{t-1}^1)] \right] \\ & \leq \frac{\alpha \mathbb{E}[\|\lambda_{t-1} - \lambda_t\|^2]}{4} + \frac{\mathbb{E}[\|g(x_{t-1}) - g(x_{t-1}, \zeta_{t-1}^1)\|^2]}{\alpha} \leq \frac{\alpha \mathbb{E}[\|\lambda_{t-1} - \lambda_t\|^2]}{4} + \frac{\sigma_g^2}{\alpha}. \end{aligned} \quad (\text{EC.16})$$

Summing (EC.14) over  $t = 1, \dots, K$  and applying (EC.15) and (EC.16), we obtain

$$\sum_{t=1}^K \mathbb{E}[T_{2,t}] \leq \sqrt{K} M_\lambda \sigma_g + \sum_{t=1}^K \left( \frac{\alpha \mathbb{E}[\|\lambda_{t-1} - \lambda_t\|^2]}{4} + \frac{\sigma_g^2}{\alpha} \right). \quad (\text{EC.17})$$

Third, consider  $T_{3,t}$ , by recalling (15) that

$$\lambda_t \in \operatorname{argmax}_{\lambda \in \mathbb{R}_+^m} \left\{ \langle g(x_{t-1}, \zeta_{t-1}^1), \lambda \rangle - \frac{\alpha}{2} \|\lambda_t - \lambda\|^2 \right\},$$

and by Lemma EC.1, we have

$$\begin{aligned} T_{3,t} &= (\lambda - \lambda_t)^\top g(x_{t-1}, \zeta_{t-1}^1) = -(\lambda_t - \lambda)^\top g(x_{t-1}, \zeta_{t-1}^1) \\ &\leq \frac{\alpha}{2} \|\lambda_{t-1} - \lambda\|^2 - \frac{\alpha}{2} \|\lambda_{t-1} - \lambda_t\|^2 - \frac{\alpha}{2} \|\lambda_t - \lambda\|^2. \end{aligned} \quad (\text{EC.18})$$

Finally, summing (EC.12) over  $t = 1, \dots, N$ , taking expectations on both sides, and plugging in (EC.13), (EC.17), and (EC.18), we conclude that

$$\begin{aligned} & \mathbb{E} \left[ \sum_{t=1}^K (\lambda - \lambda_t)^\top \mathcal{L}_g(x_t, v_t) \right] + \frac{\alpha}{2} \mathbb{E}[\|\lambda_K - \lambda\|^2] \\ & \leq \sqrt{K} M_\lambda \sigma_g + \sum_{t=1}^K \left( \frac{5C_g^2 \mathbb{E}[\|\lambda - \lambda_t\|^2]}{2\eta} + \frac{\eta}{10} \mathbb{E}[\|x_{t-1} - x_t\|^2] - \frac{\alpha}{4} \mathbb{E}[\|\lambda_{t-1} - \lambda_t\|^2] \right) \\ & \quad + \frac{\alpha}{2} \mathbb{E}[\|\lambda_0 - \lambda\|^2] + \frac{K\sigma_g^2}{\alpha}, \end{aligned}$$

which completes the proof. ■

### EC.1.6 Proof of Proposition 1

By applying Theorem 1 with  $\lambda = \lambda^*$ ,  $\pi_{1:2} = \pi_{1:2}^*$ , and  $v = v^*$  defined in (12), we set  $M_{\lambda^*} = \|\lambda^*\|$  and obtain

$$\begin{aligned} & \sum_{t=1}^K \mathbb{E} \left( \mathcal{L}(x_t, \lambda^*, \pi_{1:2}^*, v^*) - \mathcal{L}(x^*, \lambda_t, \pi_{1:2,t}, v_t) \right) + \frac{\alpha}{2} \mathbb{E}[\|\lambda_K - \lambda^*\|^2] \\ & \leq \frac{95KC_{f_1}^2 C_{f_2}^2}{2\eta} + \sqrt{K} L_{f_1} \sigma_{f_2}^2 + 3\sqrt{K} C_{f_1} \sigma_{f_2} + \frac{\eta}{2} \|x_0 - x^*\|^2 \\ & \quad + \frac{KD_X^2 C_g^2}{\alpha} + \frac{10KC_g^2 \|\lambda^*\|^2}{\eta} + \sum_{t=1}^K \frac{5C_g^2 \mathbb{E}[\|\lambda_{t-1}\|^2]}{2\eta} + \sqrt{K} \|\lambda^*\| \sigma_g \\ & \quad + \frac{\alpha}{2} \|\lambda_0 - \lambda^*\|^2 + \frac{K\sigma_g^2}{\alpha} + \sum_{t=1}^K \frac{5C_g^2 \mathbb{E}[\|\lambda^* - \lambda_t\|^2]}{2\eta}. \end{aligned}$$

By using the fact that  $\|\lambda_t\|^2 \leq 2\|\lambda_t - \lambda^*\|^2 + 2\|\lambda^*\|^2$ , we further express the above inequality as

$$\begin{aligned}
& \sum_{t=1}^K \mathbb{E} \left( \mathcal{L}(x_t, \lambda^*, \pi_{1:2}^*, v^*) - \mathcal{L}(x^*, \lambda_t, \pi_{1:2,t}, v_t) \right) + \frac{\alpha}{2} \mathbb{E}[\|\lambda_K - \lambda^*\|^2] \\
& \leq \frac{95KC_{f_1}^2 C_{f_2}^2}{2\eta} + \sqrt{K}L_{f_1}\sigma_{f_2}^2 + 3\sqrt{K}C_{f_1}\sigma_{f_2} + \frac{\eta}{2}\|x_0 - x^*\|^2 \\
& \quad + \frac{KD_X^2 C_g^2}{\alpha} + \sum_{t=1}^K \frac{15C_g^2 \|\lambda^*\|^2}{\eta} + \sum_{t=1}^K \frac{5C_g^2 \mathbb{E}[\|\lambda_{t-1} - \lambda^*\|^2]}{\eta} + \sqrt{K}\|\lambda^*\|\sigma_g \\
& \quad + \frac{\alpha}{2}\|\lambda_0 - \lambda^*\|^2 + \frac{K\sigma_g^2}{\alpha} + \sum_{t=1}^K \frac{5C_g^2 \mathbb{E}[\|\lambda^* - \lambda_t\|^2]}{2\eta}.
\end{aligned}$$

By using the min-max relationship (12) that

$$\mathcal{L}(x_t, \lambda^*, \pi_{1:2}^*, v^*) - \mathcal{L}(x^*, \lambda_t, \pi_{1:2,t}, v_{1,t}) \geq 0,$$

dividing both sides of the above inequality by  $\frac{\alpha}{2}$ , and setting  $\alpha = 2\sqrt{N}$  and  $\eta = \frac{15C_g^2\sqrt{N}}{2}$ , we obtain

$$\begin{aligned}
\mathbb{E}[\|\lambda_K - \lambda^*\|^2] & \leq \frac{2}{\alpha} \sum_{t=1}^K \mathbb{E} \left( \mathcal{L}(x_t, \lambda^*, \pi_{1:2}^*, v^*) - \mathcal{L}(x^*, \lambda_t, \pi_{1:2,t}, v_t) \right) + \mathbb{E}[\|\lambda_K - \lambda^*\|^2] \\
& \leq R_K + \frac{\mathbb{E}[\|\lambda^* - \lambda_K\|^2]}{3N} + \sum_{t=0}^{K-1} \frac{\mathbb{E}[\|\lambda^* - \lambda_t\|^2]}{N},
\end{aligned}$$

where

$$\begin{aligned}
R_K & = \frac{K}{N} \left( \frac{7C_{f_1}^2 C_{f_2}^2}{C_g^2} + \frac{D_X^2 C_g^2}{2} + 2\|\lambda^*\|^2 + \frac{\sigma_g^2}{2} \right) + \frac{15C_g^2}{4}\|x_0 - x^*\|^2 + \|\lambda_0 - \lambda^*\|^2 \\
& \quad + \frac{\sqrt{K}}{\sqrt{N}} \left( L_{f_1}\sigma_{f_2}^2 + 3C_{f_1}\sigma_{f_2} + \|\lambda^*\|\sigma_g \right).
\end{aligned}$$

Next, letting  $R$  be the constant defined in (18), we note that  $R_K \leq R$ , and the above inequality further implies that

$$\left(1 - \frac{1}{3N}\right) \mathbb{E}[\|\lambda_K - \lambda^*\|^2] \leq R + \sum_{t=0}^{K-1} \frac{\mathbb{E}[\|\lambda^* - \lambda_t\|^2]}{N}.$$

Dividing both sides of the above inequality by  $(1 - \frac{1}{3N})$ , using the fact that  $(1 - \frac{1}{3N}) \geq 1/2$  for  $N \geq 2$ , and applying Lemma 1, we conclude that

$$\begin{aligned}
\mathbb{E}[\|\lambda_K - \lambda^*\|^2] & \leq \left(1 - \frac{1}{3N}\right)^{-1} \left( R + \sum_{t=0}^{K-1} \frac{\mathbb{E}[\|\lambda^* - \lambda_t\|^2]}{N} \right) \\
& \leq 2R + 2 \sum_{t=0}^{K-1} \frac{\mathbb{E}[\|\lambda^* - \lambda_t\|^2]}{N} \leq 2R \left(1 + \frac{2}{N}\right)^K \leq 2Re^2,
\end{aligned}$$

for all  $1 \leq K \leq N$ . This completes the proof. ■

### EC.1.7 Proof of Theorem 2

*Proof:* In our analysis, we set  $\lambda_0 = 0$  for ease of presentation. Recall that  $\bar{x}_N = \frac{1}{N} \sum_{t=1}^N x_t$ , for any fixed  $(\lambda, \pi_{1:2}, v)$ , by the convexity of  $\mathcal{L}(x, \lambda, \pi_{1:2}, v)$  with respect to  $x$ , we have

$$\frac{1}{N} \sum_{t=1}^N \mathcal{L}(x_t, \lambda, \pi_{1:2}, v) \geq \mathcal{L}(\bar{x}_N, \lambda, \pi_{1:2}, v). \quad (\text{EC.19})$$

Meanwhile, we denote by

$$\hat{\pi}_2 \in \partial f_2(\bar{x}_N), \hat{\pi}_1 = \nabla f_1(f_2(\bar{x}_N)), \text{ and } \hat{v} \in \partial g(\bar{x}_N), \quad (\text{EC.20})$$

the dual variables associated with  $\bar{x}_N$ . By the definition of composite Lagrangian (10), we have

$$F(\bar{x}_N) = \mathcal{L}_F(\bar{x}_N, \hat{\pi}_{1:2}) = \mathcal{L}(\bar{x}_N, 0, \hat{\pi}_{1:2}, \hat{v}). \quad (\text{EC.21})$$

First, we derive the convergence rate of the objective optimality gap  $F(\bar{x}_N) - F(x^*)$ . Let  $\bar{\lambda}_N = \frac{1}{N} \sum_{t=1}^N \lambda_t$ ,  $\bar{\pi}_{1:2,N} = \frac{1}{N} \sum_{t=1}^N \pi_{1:2,t}$ , and  $\bar{v}_N = \frac{1}{N} \sum_{t=1}^N v_t$ . By setting  $\lambda = 0$ ,  $\pi_{1:2} = \hat{\pi}_{1:2}$ , and  $v = \hat{v}$  within (EC.20), and using (12) that  $\mathcal{L}(x^*, \lambda^*, \pi_{1:2}^*, v^*) \geq \mathcal{L}(x^*, \lambda, \pi_{1:2}, v)$  for any  $(\lambda, \pi_{1:2}, v) \in \mathbb{R}_+^m \times \Pi \times \mathcal{V}$ , we have

$$\begin{aligned} & \frac{1}{N} \sum_{t=1}^N \left( \mathcal{L}(x_t, 0, \hat{\pi}_{1:2}, \hat{v}) - \mathcal{L}(x^*, \lambda_t, \pi_{1:2,t}, v_t) \right) \\ & \geq \mathcal{L}(\bar{x}_N, 0, \hat{\pi}_{1:2}, \hat{v}) - \mathcal{L}(x^*, \lambda^*, \pi_{1:2}^*, v^*) = F(\bar{x}_N) - F(x^*), \end{aligned} \quad (\text{EC.22})$$

where the last equality holds by (EC.21). Therefore, by (EC.22), setting the feasible point as  $(x^*, \lambda, \pi_{1:2}, v) = (x^*, 0, \hat{\pi}_{1:2}, \hat{v})$ , and applying Theorem 1 with the fact  $\|\lambda\| = 0$  when  $\lambda = 0$ , we have

$$\begin{aligned} \mathbb{E}[F(\bar{x}_N)] - F(x^*) & \leq \frac{1}{N} \sum_{t=1}^N \mathbb{E} \left( \mathcal{L}(x_t, 0, \hat{\pi}_{1:2}, \hat{v}) - \mathcal{L}(x^*, \lambda_t, \pi_{1:2,t}, v_t) \right) \\ & \leq \frac{1}{\sqrt{N}} \left( \frac{7C_{f_1}^2 C_{f_2}^2}{C_g^2} + L_{f_1} \sigma_{f_2}^2 + 3C_{f_1} \sigma_{f_2} + \frac{15C_g^2}{4} \|x_0 - x^*\|^2 \right) \\ & \quad + \frac{1}{N} \sum_{t=1}^N \left( \frac{\mathbb{E}[\|\lambda_{t-1}\|^2]}{3\sqrt{N}} + \frac{\mathbb{E}[\|\lambda_t\|^2]}{3\sqrt{N}} \right) \\ & \leq \frac{1}{\sqrt{N}} \left( \frac{7C_{f_1}^2 C_{f_2}^2}{C_g^2} + L_{f_1} \sigma_{f_2}^2 + 3C_{f_1} \sigma_{f_2} + \frac{15C_g^2}{4} \|x_0 - x^*\|^2 \right) + \frac{(4\|\lambda^*\|^2 + 8Re^2)}{3\sqrt{N}}, \end{aligned}$$

where the last inequality comes from the bound of  $\|\lambda_t\|^2$  provided by Proposition 1 that

$$\mathbb{E}[\|\lambda_t\|^2] \leq 2\|\lambda^*\|^2 + 2\mathbb{E}[\|\lambda_t - \lambda^*\|^2] \leq 2\|\lambda^*\|^2 + 4Re^2, \text{ for all } t = 1, 2, \dots, N. \quad (\text{EC.23})$$

This establishes the convergence rate for the objective optimality gap  $F(\bar{x}_N) - F(x^*)$ .

Second, we consider the feasibility residual  $\|g(\bar{x}_N)_+\|_2$ . Recall that  $\hat{\pi}_{1:2}$  and  $\hat{v}$  are the dual variables associated with  $\bar{x}_N$  such that  $\hat{\pi}_{1:2} \in \operatorname{argmax}_{\pi_{1:2} \in \Pi} \mathcal{L}_F(\bar{x}_N, \pi_{1:2})$  and  $\hat{v} \in \operatorname{argmax}_{v \in \mathcal{V}} \mathcal{L}_g(\bar{x}_N, v)$ , we have

$$F(\bar{x}_N) = \mathcal{L}_F(\bar{x}_N, \hat{\pi}_{1:2}) \geq \mathcal{L}_F(\bar{x}_N, \pi_{1:2}^*) \text{ and } g(\bar{x}_N) = \mathcal{L}_g(\bar{x}_N, \hat{v}) \geq \mathcal{L}_g(\bar{x}_N, v^*).$$

Since  $\lambda^* \geq 0$ , by the above inequalities and the min-max relationship (12), we can see

$$\begin{aligned}\mathcal{L}(\bar{x}_N, \lambda^*, \hat{\pi}_{1:2}, \hat{v}) &= \mathcal{L}_F(\bar{x}_N, \hat{\pi}) + \langle \lambda^*, \mathcal{L}_g(\bar{x}_N, \hat{v}) \rangle \\ &\geq \mathcal{L}_F(\bar{x}_N, \pi_{1:2}^*) + \langle \lambda^*, \mathcal{L}_g(\bar{x}_N, v^*) \rangle = \mathcal{L}(\bar{x}_N, \lambda^*, \pi_{1:2}^*, v^*) \geq \mathcal{L}(x^*, \lambda^*, \pi_{1:2}^*, v^*),\end{aligned}$$

which further implies

$$F(\bar{x}_N) + \langle \lambda^*, g(\bar{x}_N) \rangle - F(x^*) \geq 0.$$

Meanwhile, due to the facts that  $\lambda^* \geq 0$  and  $g(\bar{x}_N) \leq g(\bar{x}_N)_+$ , we have  $\langle \lambda^*, g(\bar{x}_N) \rangle \leq \langle \lambda^*, g(\bar{x}_N)_+ \rangle$ , hence,

$$F(\bar{x}_N) + \|\lambda^*\| \|g(\bar{x}_N)_+\| - F(x^*) \geq F(\bar{x}_N) + \langle \lambda^*, g(\bar{x}_N) \rangle - F(x^*) \geq 0. \quad (\text{EC.24})$$

Let  $\tilde{\lambda} = (\|\lambda^*\|_2 + 1)g(\bar{x}_N)_+ / \|g(\bar{x}_N)_+\|$ . Consider another feasible point  $(x^*, \tilde{\lambda}, \hat{\pi}_{1:2}, \hat{v})$ , by (EC.19) and the facts that  $g(\bar{x}_N)^\top g(\bar{x}_N)_+ = \|g(\bar{x}_N)_+\|^2$  and  $\mathcal{L}(x^*, \lambda_t, \pi_{1:2,t}, v_t) \leq \mathcal{L}(x^*, \lambda^*, \pi_{1:2}^*, v^*)$ , we have  $\langle g(\bar{x}_N), \tilde{\lambda} \rangle = (\|\lambda^*\|_2 + 1)\|g(\bar{x}_N)_+\|$ , which further yields that

$$\begin{aligned}\frac{1}{N} \sum_{t=1}^N \left( \mathcal{L}(x_t, \tilde{\lambda}, \hat{\pi}_{1:2}, \hat{v}) - \mathcal{L}(x^*, \lambda_t, \pi_{1:2,t}, v_t) \right) &\geq \mathcal{L}(\bar{x}_N, \tilde{\lambda}, \hat{\pi}_{1:2}, \hat{v}) - \mathcal{L}(x^*, \lambda^*, \pi_{1:2}^*, v^*) \\ &= F(\bar{x}_N) + \langle \tilde{\lambda}, g(\bar{x}_N) \rangle - F(x^*) = F(\bar{x}_N) + (\|\lambda^*\|_2 + 1)\|g(\bar{x}_N)_+\| - F(x^*).\end{aligned}$$

By rearranging the terms in the inequality above and applying (EC.24), we obtain

$$\begin{aligned}\|g(\bar{x}_N)_+\| &\leq \frac{1}{N} \sum_{t=1}^N \left( \mathcal{L}(x_t, \tilde{\lambda}, \hat{\pi}_{1:2}, \hat{v}) - (\mathcal{L}(x^*, \lambda_t, \pi_{1:2,t}, v_t)) \right) \\ &\quad - \left( F(\bar{x}_N) + \|\lambda^*\| \|g(\bar{x}_N)_+\| - F(x^*) \right) \\ &\leq \frac{1}{N} \sum_{t=1}^N \left( \mathcal{L}(x_t, \tilde{\lambda}, \hat{\pi}_{1:2}, \hat{v}) - \mathcal{L}(x^*, \lambda_t, \pi_{1:2,t}, v_t) \right).\end{aligned}$$

Next, we note that  $\|\tilde{\lambda}\| = \|\lambda^*\| + 1$ . By the inequality above, considering the feasible point  $(x^*, \tilde{\lambda}, \hat{\pi}_{1:2}, \hat{v})$ , and applying Theorem 1 with  $\lambda_0 = 0$ ,  $M_{\tilde{\lambda}} = \|\tilde{\lambda}\| = \|\lambda^*\| + 1$ ,  $\alpha = 2\sqrt{N}$ , and  $\eta = \frac{15C_g^2\sqrt{N}}{2}$ , we have

$$\begin{aligned}\mathbb{E}[\|g(\bar{x}_N)_+\|] &\leq \frac{95C_{f_1}^2 C_{f_2}^2}{2\eta} + \frac{L_{f_1}\sigma_{f_2}^2}{\sqrt{N}} + \frac{3C_{f_1}\sigma_{f_2}}{\sqrt{N}} + \frac{\eta}{2N}\|x_0 - x^*\|^2 + \frac{D_X^2 C_g^2}{\alpha} + \frac{\|\tilde{\lambda}\|\sigma_g}{\sqrt{N}} \\ &\quad + \frac{1}{N} \left[ \frac{\alpha}{2}\|\tilde{\lambda}\|^2 + \frac{N\sigma_g^2}{\alpha} + \sum_{t=1}^N \left( \frac{5C_g^2\mathbb{E}[\|\lambda_{t-1}\|^2]}{2\eta} + \frac{10C_g^2\mathbb{E}[\|\tilde{\lambda}\|^2]}{\eta} + \frac{5C_g^2\mathbb{E}[\|\tilde{\lambda} - \lambda_t\|^2]}{2\eta} \right) \right] \\ &\leq \frac{1}{\sqrt{N}} \left( \frac{7C_{f_1}^2 C_{f_2}^2}{C_g^2} + L_{f_1}\sigma_{f_2}^2 + 3C_{f_1}\sigma_{f_2} + \frac{15}{4}\|x_0 - x^*\|^2 + \frac{D_X^2 C_g^2}{2} + \|\tilde{\lambda}\|\sigma_g + \|\tilde{\lambda}\|^2 \right) \\ &\quad + \frac{\sigma_g^2}{2\sqrt{N}} + \frac{1}{N} \sum_{t=1}^N \left( \frac{\mathbb{E}[\|\lambda_{t-1}\|^2]}{3\sqrt{N}} + \frac{4\|\tilde{\lambda}\|^2}{3\sqrt{N}} + \frac{2(\|\tilde{\lambda}\|^2 + \mathbb{E}[\|\lambda_t\|^2])}{3\sqrt{N}} \right) \\ &\leq \frac{1}{\sqrt{N}} \left( \frac{7C_{f_1}^2 C_{f_2}^2}{C_g^2} + L_{f_1}\sigma_{f_2}^2 + 3C_{f_1}\sigma_{f_2} + \frac{15C_g^2}{4}\|x_0 - x^*\|^2 + \frac{D_X^2 C_g^2}{2} + \frac{\sigma_g^2}{2} \right) \\ &\quad + \frac{1}{\sqrt{N}} \left( (2\|\lambda^*\|^2 + 4Re^2) + 3\|\tilde{\lambda}\|^2 + \|\tilde{\lambda}\|\sigma_g \right),\end{aligned}$$

where the second inequality holds because  $\|\tilde{\lambda} - \lambda_t\|^2 \leq 2\|\tilde{\lambda}\|^2 + 2\|\lambda_t\|^2$ , and the last inequality holds by the bound of  $\|\lambda_t\|^2$  in (EC.23). The desired result can be acquired by substituting  $\|\tilde{\lambda}\| = \|\lambda^*\|_2 + 1$  and  $\|\tilde{\lambda}\|^2 = (\|\lambda^*\|_2 + 1)^2$  into the above inequality. This completes the proof.  $\blacksquare$

## EC.2 Proof of Results in Section 3

### EC.2.1 Proof of Lemma 3

First, we decompose  $(\lambda - \lambda_t)^\top \mathcal{L}_G(x_t, v_{1:2,t})$  that

$$\begin{aligned} & (\lambda - \lambda_t)^\top \mathcal{L}_G(x_t, v_{1:2,t}) \\ &= (\lambda - \lambda_t)^\top \left( \mathcal{L}_G(x_t, v_{1:2,t}) - \mathcal{L}_G(x_{t-1}, v_{1:2,t}) \right) + (\lambda - \lambda_t)^\top \mathcal{L}_G(x_{t-1}, v_{1:2,t}) \\ &= \underbrace{\langle v_{2,t} v_{1,t} (\lambda - \lambda_t), x_t - x_{t-1} \rangle}_{T_{1,t}} + \underbrace{(\lambda - \lambda_t)^\top [\mathcal{L}_G(x_{t-1}, v_{1:2,t}) - H_t]}_{T_{2,t}} + \underbrace{(\lambda - \lambda_t)^\top H_t}_{T_{3,t}}. \end{aligned} \quad (\text{EC.25})$$

We now provide bounds for the three terms  $T_{1,t}$ ,  $T_{2,t}$ , and  $T_{3,t}$ . First, for  $T_{1,t}$ , by the fact that  $\langle a, b \rangle \leq \frac{5\|a\|^2}{2\eta} + \frac{\eta\|b\|^2}{10}$  for any vectors  $a, b$ , we have

$$\begin{aligned} \sum_{t=1}^K \mathbb{E}[T_{1,t}] &= \sum_{t=1}^K \mathbb{E}[(x_t - x_{t-1})^\top v_{2,t} v_{1,t} (\lambda - \lambda_t)] \\ &\leq \sum_{t=1}^K \frac{5\mathbb{E}[\|v_{2,t} v_{1,t} (\lambda - \lambda_t)\|^2]}{2\eta} + \sum_{t=1}^K \frac{\eta\mathbb{E}[\|x_t - x_{t-1}\|^2]}{10} \\ &\leq \sum_{t=1}^K \frac{5C_{g_1}^2 C_{g_2}^2 \mathbb{E}[\|\lambda - \lambda_t\|^2]}{2\eta} + \sum_{t=1}^K \frac{\eta\mathbb{E}[\|x_t - x_{t-1}\|^2]}{10}, \end{aligned} \quad (\text{EC.26})$$

where the last inequality holds by Assumption 4 (d)-(e) that  $\|v_{1,t}\|^2 \leq C_{g_1}^2$  and  $\|v_{2,t}\|^2 \leq C_{g_2}^2$ . Second, we consider  $T_{2,t}$  and denote by  $\tilde{\Delta}_{2,t} = \mathcal{L}_G(x_{t-1}, v_{1:2,t}) - H_t$ . Given  $x_{t-1}$ , we observe from Algorithm 2 that  $H_t$  is conditionally independent of  $\lambda_{t-1}$ . Together with Lemma 2(a) that  $H_t$  is also an unbiased estimator for  $\mathcal{L}_G(x_{t-1}, v_{1:2,t})$ , we have  $\mathbb{E}[\lambda_{t-1}^\top \tilde{\Delta}_{2,t}] = 0$ , which further implies that

$$\begin{aligned} \mathbb{E}[T_{2,t}] &= \mathbb{E}[\lambda^\top \tilde{\Delta}_{2,t}] - \mathbb{E}[\tilde{\Delta}_{2,t}^\top \lambda_{t-1}] + \mathbb{E}[(\lambda_{t-1} - \lambda_t)^\top \tilde{\Delta}_{2,t}] \\ &= \mathbb{E}[\lambda^\top \tilde{\Delta}_{2,t}] + \mathbb{E}[(\lambda_{t-1} - \lambda_t)^\top \tilde{\Delta}_{2,t}]. \end{aligned}$$

By setting  $M_\lambda = \|\lambda\|$  and recalling Lemma 2(b) that  $\text{Var}(\tilde{\Delta}_{2,t}) \leq \sigma_H^2$ , we further have

$$\begin{aligned} \sum_{t=1}^K \mathbb{E}[T_{2,t}] &= \sum_{t=1}^K \mathbb{E}[\lambda^\top \tilde{\Delta}_{2,t}] + \sum_{t=1}^K \mathbb{E}[(\lambda_{t-1} - \lambda_t)^\top \tilde{\Delta}_{2,t}] \\ &\leq \sqrt{K} M_\lambda \sigma_H + \sum_{t=1}^K \mathbb{E}[(\lambda_{t-1} - \lambda_t)^\top \tilde{\Delta}_{2,t}] \\ &\leq \sqrt{K} M_\lambda \sigma_H + \sum_{t=1}^K \left( \frac{\alpha \mathbb{E}[\|\lambda_{t-1} - \lambda_t\|^2]}{4} + \frac{\sigma_H^2}{\alpha} \right), \end{aligned} \quad (\text{EC.27})$$

where the first inequality holds by Lemma EC.2 in Appendix Section EC.1, and the last inequality holds by the fact  $\langle a, b \rangle \leq \frac{\|a\|^2}{4} + \|b\|^2$  for any vectors  $a, b$ .

Finally, for  $T_{3,t}$ , by applying the three-point Lemma EC.1 to the update rule that

$$\lambda_t \in \operatorname{argmax}_{\lambda \in \mathbb{R}_+^m} \left\{ \lambda^\top H_t - \frac{\alpha}{2} \|\lambda_{t-1} - \lambda\|^2 \right\},$$

we have that for any  $\lambda \in \mathbb{R}_+^m$ ,

$$(\lambda - \lambda_t)^\top H_t = -(\lambda_t - \lambda)^\top H_t \leq \frac{\alpha}{2} \|\lambda_{t-1} - \lambda\|^2 - \frac{\alpha}{2} \|\lambda_{t-1} - \lambda_t\|^2 - \frac{\alpha}{2} \|\lambda_t - \lambda\|^2,$$

which implies

$$\mathbb{E}[T_{3,t}] \leq \sum_{t=1}^K \left( \frac{\alpha}{2} \|\lambda_{t-1} - \lambda\|^2 - \frac{\alpha}{2} \|\lambda_{t-1} - \lambda_t\|^2 - \frac{\alpha}{2} \|\lambda_t - \lambda\|^2 \right). \quad (\text{EC.28})$$

Summing (EC.25) over  $t = 1, \dots, K$ , taking expectations, and plugging (EC.26), (EC.27), and (EC.28) in, we obtain that for all  $\lambda \in \mathbb{R}_+^m$ ,

$$\begin{aligned} & \mathbb{E} \left[ \sum_{t=1}^K (\lambda - \lambda_t)^\top \mathcal{L}_G(x_t, v_{1,t}, v_{2,t}) \right] \\ & \leq \frac{\alpha}{2} \mathbb{E}[\|\lambda_0 - \lambda\|^2] - \frac{\alpha}{2} \mathbb{E}[\|\lambda_K - \lambda\|^2] - \sum_{t=1}^K \frac{\alpha}{2} \mathbb{E}[\|\lambda_{t-1} - \lambda_t\|^2] + \sqrt{K} M_\lambda \sigma_H \\ & \quad + \sum_{t=1}^K \left( \frac{\alpha \mathbb{E}[\|\lambda_{t-1} - \lambda_t\|^2]}{4} + \frac{\sigma_H^2}{\alpha} + \frac{5C_{g_1}^2 C_{g_2}^2 \mathbb{E}[\|\lambda - \lambda_t\|^2]}{2\eta} + \frac{\eta \mathbb{E}[\|x_t - x_{t-1}\|^2]}{10} \right) \\ & \leq \frac{\alpha}{2} \|\lambda_0 - \lambda\|^2 - \frac{\alpha}{2} \mathbb{E}[\|\lambda_K - \lambda\|^2] + \sqrt{K} M_\lambda \sigma_H \\ & \quad + \sum_{t=1}^K \left( \frac{\sigma_H^2}{\alpha} - \frac{\alpha \mathbb{E}[\|\lambda_{t-1} - \lambda_t\|^2]}{4} + \frac{5C_{g_1}^2 C_{g_2}^2 \mathbb{E}[\|\lambda - \lambda_t\|^2]}{2\eta} + \frac{\eta \mathbb{E}[\|x_t - x_{t-1}\|^2]}{10} \right), \end{aligned}$$

which completes the proof. ■

### EC.2.2 Proof of Theorem 3

We provide bound on each term after decomposing (28). Consider any integer  $K$  such that  $K \leq N$ . First, by Lemma EC.7 in Appendix Section EC.2, we obtain

$$\begin{aligned} & \sum_{t=1}^K \mathbb{E} \left[ \lambda^\top \left( \mathcal{L}_G(x_t, v_{1:2}) - \mathcal{L}_G(x_t, v_{1:2,t}) \right) \right] \\ & \leq \sum_{t=1}^K \frac{\eta}{10} \mathbb{E}[\|x_t - x_{t-1}\|^2] + \frac{40K C_{g_1}^2 C_{g_2}^2 M_\lambda^2}{\eta} + 2\sqrt{K} L_{g_1} \sigma_{g_2}^2 M_\lambda + 3\sqrt{K} C_{g_1} \sigma_{g_2} M_\lambda. \end{aligned} \quad (\text{EC.29})$$

Second, by Lemma EC.8 in Appendix Section EC.2, we have

$$\begin{aligned} & \sum_{t=1}^K \mathbb{E} \left[ \mathcal{L}_F(x_t, \pi_{1:2,t}) - \mathcal{L}_F(x^*, \pi_{1:2,t}) + \lambda_t^\top \left( \mathcal{L}_G(x_t, v_{1:2,t}) - \mathcal{L}_G(x^*, v_{1:2,t}) \right) \right] \\ & \leq \frac{\eta}{2} \|x_0 - x^*\|^2 - \sum_{t=1}^K \frac{3\eta}{10} \mathbb{E}[\|x_{t-1} - x_t\|^2] + \sum_{t=1}^K \frac{5C_{f_1}^2 C_{f_2}^2}{2\eta} \\ & \quad + \sum_{t=1}^K \frac{\alpha}{4} \mathbb{E}[\|\lambda_t - \lambda_{t-1}\|^2] + \sum_{t=1}^K \frac{D_X^2 C_{g_1}^2 C_{g_2}^2}{\alpha} + \sum_{t=1}^K \frac{5C_{g_1}^2 C_{g_2}^2 \mathbb{E}[\|\lambda_{t-1}\|^2]}{2\eta}. \end{aligned} \quad (\text{EC.30})$$

Meanwhile, Lemma EC.3 in Appendix Section EC.1.2 implies that

$$\begin{aligned} & \sum_{t=1}^K \mathbb{E} \left[ \mathcal{L}_F(x_t, \pi_{1:2}) - \mathcal{L}_F(x_t, \pi_{1:2,t}) \right] \\ & \leq \sum_{t=1}^K \frac{\eta}{10} \mathbb{E} \left[ \|x_t - x_{t-1}\|^2 \right] + \frac{40KC_{f_1}^2 C_{f_2}^2}{\eta} + 2\sqrt{K}L_{f_1}\sigma_{f_2}^2 + 3\sqrt{K}C_{f_1}\sigma_{f_2}. \end{aligned} \quad (\text{EC.31})$$

Finally, by Lemma 3 and the assumption that  $\|\lambda\| \leq M_\lambda$ , we have

$$\begin{aligned} & \mathbb{E} \left[ \sum_{t=1}^K (\lambda - \lambda_t)^\top \mathcal{L}_G(x_t, v_{1:2,t}) \right] + \frac{\alpha}{2} \mathbb{E} \left[ \|\lambda_K - \lambda\|^2 \right] \\ & \leq \sum_{t=1}^K \left( \frac{\sigma_H^2}{\alpha} - \frac{\alpha \mathbb{E}[\|\lambda_{t-1} - \lambda_t\|^2]}{4} + \frac{5C_{g_1}^2 C_{g_2}^2 \mathbb{E}[\|\lambda - \lambda_t\|^2]}{2\eta} + \frac{\eta \mathbb{E}[\|x_t - x_{t-1}\|^2]}{10} \right) \\ & \quad + \frac{\alpha}{2} \mathbb{E} \left[ \|\lambda_0 - \lambda\|^2 \right] + \sqrt{K}M_\lambda\sigma_H. \end{aligned} \quad (\text{EC.32})$$

By substituting (EC.29), (EC.30), (EC.31), and (EC.32) into (28), and omitting some algebras, we obtain

$$\begin{aligned} & \sum_{t=1}^K \mathbb{E} \left( \mathcal{L}(x_t, \lambda, \pi_{1:2}, v_{1:2}) - \mathcal{L}(x^*, \lambda_t, \pi_{1:2,t}, v_{1:2,t}) \right) + \frac{\alpha}{2} \mathbb{E}[\|\lambda_K - \lambda\|^2] \\ & \leq \frac{40KC_{g_1}^2 C_{g_2}^2 M_\lambda^2}{\eta} + 2\sqrt{K}L_{g_1}\sigma_{g_2}^2 M_\lambda + 3\sqrt{K}C_{g_1}\sigma_{g_2}M_\lambda + \frac{\eta}{2} \|x_0 - x^*\|^2 \\ & \quad + \frac{95KC_{f_1}^2 C_{f_2}^2}{2\eta} + \frac{K}{\alpha} (D_X^2 C_{g_1}^2 C_{g_2}^2 + \sigma_H^2) + \frac{\alpha}{2} \mathbb{E}[\|\lambda_0 - \lambda\|^2] + \sqrt{K}M_\lambda\sigma_H \\ & \quad + 2\sqrt{K}L_{f_1}\sigma_{f_2}^2 + 3\sqrt{K}C_{f_1}\sigma_{f_2} + \sum_{t=1}^K \frac{5C_{g_1}^2 C_{g_2}^2}{2\eta} \left( \mathbb{E}[\|\lambda - \lambda_t\|^2] + \mathbb{E}[\|\lambda_{t-1}\|^2] \right). \end{aligned}$$

This completes the proof. ■

**Lemma EC.7** *Suppose Assumptions 1, 3, and 4 hold, and Algorithm 2 generates  $\{(x_t, \lambda_t, \pi_{1:2,t}, v_{1:2,t})\}_{t=1}^N$  by setting  $\tau_t = \rho_t = t/2$ ,  $\eta_t = \eta$ , and  $\alpha_t = \alpha$  for  $t = 1, 2, \dots, N$ . Letting  $\lambda \in \mathbb{R}_+^m$  be a bounded random variable satisfying  $\|\lambda\| \leq M_\lambda$  uniformly, then for any  $K \leq N$ , we have*

$$\begin{aligned} & \sum_{t=1}^K \mathbb{E} \left[ \lambda^\top \left( \mathcal{L}_G(x_t, v_{1:2}) - \mathcal{L}_G(x_t, v_{1:2,t}) \right) \right] \\ & \leq \sum_{t=1}^K \frac{\eta}{10} \mathbb{E}[\|x_t - x_{t-1}\|^2] + \frac{60KC_{g_1}^2 C_{g_2}^2 M_\lambda^2}{\eta} + 2\sqrt{K}L_{g_1}M_\lambda\sigma_{g_2}^2 + 4\sqrt{K}M_\lambda C_{g_1}\sigma_{g_2}. \end{aligned}$$

*Proof:* This result is similar to Lemma EC.3 with an additional nonnegative (random) variable  $\lambda$ . We start with the following decomposition that

$$\begin{aligned} & \lambda^\top (\mathcal{L}_G(x_t, v_{1:2}) - \mathcal{L}_G(x_t, v_{1:2,t})) \\ & = \lambda^\top (\mathcal{L}_{g_1}(x_t, v_1, v_2) - \mathcal{L}_{g_1}(x_t, v_1, v_{2,t})) + \lambda^\top (\mathcal{L}_{g_1}(x_t, v_1, v_{2,t}) - \mathcal{L}_{g_1}(x_t, v_{1,t}, v_{2,t})). \end{aligned}$$

First, we recall (25) that  $v_{2,t} \in \operatorname{argmax}_{v_2 \in \mathcal{V}_2} \{v_2^\top x_{t-1} - g_2^*(v_2)\}$ . By Assumption 4 (g) that for each compositional constraint  $G^{(j)} = g_1^{(j)} \circ g_2^{(j)}(x)$ , the outer-level function  $g_1^{(j)}$  is monotone nondecreasing for non-affine inner-level function  $g_2^{(j)}$ , we obtain

$$\mathbb{E} \left[ \left\langle (v_2 - v_{2,t})^\top x_{t-1} - g_2^*(v_2) + g_2^*(v_{2,t}), v_1 \right\rangle \right] \leq 0.$$

Because  $\lambda \geq 0$ , by following (EC.6) in Lemma EC.3, we have

$$\begin{aligned} \sum_{t=1}^K \mathbb{E} \left[ \lambda^\top \left( \mathcal{L}_{g_1}(x_t, v_1, v_2) - \mathcal{L}_{g_1}(x_t, v_1, v_{2,t}) \right) \right] &\leq \sum_{t=1}^K \mathbb{E} [\langle (v_2 - v_{2,t}) v_1 \lambda, x_t - x_{t-1} \rangle] \\ &\leq \sum_{t=1}^K \left[ \frac{10 \mathbb{E} [\| (v_2 - v_{2,t}) v_1 \lambda \|^2]}{\eta} + \frac{\eta}{20} \mathbb{E} [\| x_t - x_{t-1} \|^2] \right] \\ &\leq \sum_{t=1}^K \left[ \frac{40 C_{g_1}^2 C_{g_2}^2 M_\lambda^2}{\eta} + \frac{\eta}{20} \mathbb{E} [\| x_t - x_{t-1} \|^2] \right], \end{aligned}$$

where the last inequality uses the fact that  $\|\lambda\| \leq M_\lambda$ . Second, by Proposition 15 in ?, the  $L_{g_1}$  smoothness of  $g_1$  implies  $\lambda^\top D_{g_1^*}(v_1; \bar{v}_1) \geq \frac{\|\lambda^\top (v_1 - \bar{v}_1)\|^2}{2\|\lambda\| L_{g_1}} \geq \frac{\|\lambda^\top (v_1 - \bar{v}_1)\|^2}{2M_\lambda L_{g_1}}$ , which further yields

$$\begin{aligned} \sum_{t=1}^K \mathbb{E} \left[ \lambda^\top (v_{1,t} - v_{1,t-1})^\top (g_2(x_{t-1}, \zeta_{2,t-1}^1) - g_2(x_{t-1})) - \rho_t \lambda^\top D_{g_1^*}(v_{1,t}; v_{1,t-1}) \right] \\ \leq \sum_{t=2}^K \frac{M_\lambda L_{g_1} \sigma_{g_2}^2}{\rho_t} + \sqrt{\mathbb{E} [\|\lambda\|^2 \|v_{1,1} - v_{1,0}\|^2]} \sqrt{\mathbb{E} [\|g_2(x_0, \zeta_{2,0}^1) - g_2(x_0)\|^2]} \\ \leq 2L_{g_1} M_\lambda \sigma_{g_2}^2 \log K + 2M_\lambda C_{g_1} \sigma_{g_2} \\ \leq 2\sqrt{K} L_{g_1} M_\lambda \sigma_{g_2}^2 + 2\sqrt{K} M_\lambda C_{g_1} \sigma_{g_2}. \end{aligned}$$

By substituting the above bound into Proposition 6 of ?, we further obtain that

$$\begin{aligned} \sum_{t=1}^K \mathbb{E} \left[ \lambda^\top \left( \mathcal{L}_{g_1}(x_t, v_1, v_{2,t}) - \mathcal{L}_{g_1}(x_t, v_{1,t}, v_{2,t}) \right) \right] \\ \leq \sum_{t=1}^K \left[ \frac{20 C_{g_1}^2 C_{g_2}^2 M_\lambda^2}{\eta} + \frac{\eta}{20} \mathbb{E} [\| x_t - x_{t-1} \|^2] \right] + 2\sqrt{K} L_{g_1} M_\lambda \sigma_{g_2}^2 + 4\sqrt{K} M_\lambda C_{g_1} \sigma_{g_2}. \end{aligned}$$

The desired result then follows by combining the preceding inequalities.  $\blacksquare$

**Lemma EC.8** *Suppose Assumptions 1, 3, and 4 hold, and Algorithm 2 generates  $\{(x_t, \lambda_t, \pi_t, v_t)\}_{t=1}^N$  by setting  $\rho_t = \tau_t = \frac{t}{2}$ ,  $\eta_t = \eta$ , and  $\alpha_t = \alpha$  for  $t \leq N$ . Then for any integer  $K \leq N$ , we have*

$$\begin{aligned} \sum_{t=1}^K \mathbb{E} \left[ \mathcal{L}_F(x_t, \pi_{1:2,t}) - \mathcal{L}_F(x^*, \pi_{1:2,t}) + \lambda_t^\top \left( \mathcal{L}_G(x_t, v_{1:2,t}) - \mathcal{L}_G(x^*, v_{1:2,t}) \right) \right] \\ \leq \frac{\eta}{2} \|x_0 - x^*\|^2 - \sum_{t=1}^K \frac{3\eta_{t-1}}{10} \mathbb{E} [\|x_{t-1} - x_t\|^2] + \sum_{t=1}^K \frac{5C_{f_1}^2 C_{f_2}^2}{2\eta} \\ + \sum_{t=1}^K \frac{\alpha}{4} \mathbb{E} [\|\lambda_t - \lambda_{t-1}\|^2] + \sum_{t=1}^K \frac{D_X^2 C_{g_1}^2 C_{g_2}^2}{\alpha} + \sum_{t=1}^K \frac{5C_{g_1}^2 C_{g_2}^2 \mathbb{E} [\|\lambda_{t-1}\|^2]}{2\eta}. \end{aligned}$$

*Proof:* Recall the update rule for  $x_t$  (26) that

$$x_t = \operatorname{argmin}_{x \in \mathcal{X}} \left\{ \left\langle \pi_{2,t}^0 \pi_{1,t}^0 + v_{2,t}^0 v_{1,t}^0 \lambda_{t-1}, x \right\rangle + \frac{\eta}{2} \|x_{t-1} - x\|^2 \right\}.$$

By following analogous analysis in Lemma EC.4, and applying the three-point Lemma EC.1 to the above update rule, we have

$$\begin{aligned} & \mathcal{L}_F(x_t, \pi_{1:2,t}) - \mathcal{L}_F(x^*, \pi_{1:2,t}) + \lambda_t^\top \left( \mathcal{L}_G(x_t, v_{1:2,t}) - \mathcal{L}_G(x^*, v_{1:2,t}) \right) \\ &= (x_t - x^*)^\top \pi_{2,t} \pi_{1,t} + (x_t - x^*)^\top v_{2,t} v_{1,t} \lambda_t \\ &\leq \frac{\eta}{2} \|x_{t-1} - x^*\|^2 - \frac{\eta}{2} \|x_{t-1} - x_t\|^2 - \frac{\eta}{2} \|x_t - x^*\|^2 \\ &\quad + \langle \pi_{2,t} \pi_{1,t} - \pi_{2,t}^0 \pi_{1,t}^0, x_t - x^* \rangle + \tilde{\Lambda}_{1,t} + \tilde{\Lambda}_{2,t}, \end{aligned} \tag{EC.33}$$

where

$$\tilde{\Lambda}_{1,t} = (x_t - x^*)^\top v_{2,t} v_{1,t} (\lambda_t - \lambda_{t-1}) \text{ and } \tilde{\Lambda}_{2,t} = (x_t - x^*)^\top (v_{2,t} v_{1,t} - v_{2,t}^0 v_{1,t}^0) \lambda_{t-1}.$$

We note that a bound for  $\langle \pi_{2,t} \pi_{1,t} - \pi_{2,t}^0 \pi_{1,t}^0, x_t - x^* \rangle$  has been provided in (EC.9). Specifically, we have

$$\begin{aligned} \mathbb{E} \left[ \sum_{t=1}^K \langle \pi_{2,t} \pi_{1,t} - \pi_{2,t}^0 \pi_{1,t}^0, x_t - x^* \rangle \right] &= \mathbb{E} \left[ \sum_{t=1}^K \langle \pi_{2,t} \pi_{1,t} - \pi_{2,t}^0 \pi_{1,t}^0, x_t - x_{t-1} \rangle \right] \\ &\leq \sum_{t=1}^K \left( \frac{5C_{f_1}^2 C_{f_2}^2}{2\eta} + \frac{\eta \mathbb{E}[\|x_t - x_{t-1}\|^2]}{10} \right). \end{aligned} \tag{EC.34}$$

To bound  $\tilde{\Lambda}_{1,t}$ , by following the analysis of (EC.10), we have

$$\begin{aligned} \mathbb{E}[\tilde{\Lambda}_{1,t}] &\leq \frac{\alpha}{4} \mathbb{E}[\|\lambda_t - \lambda_{t-1}\|^2] + \frac{1}{\alpha} \mathbb{E}[\|(x_t - x^*)^\top v_{2,t} v_{1,t}\|^2] \\ &\leq \frac{\alpha}{4} \mathbb{E}[\|\lambda_t - \lambda_{t-1}\|^2] + \frac{D_X^2 C_{g_1}^2 C_{g_2}^2}{\alpha}. \end{aligned} \tag{EC.35}$$

Meanwhile, we observe from Algorithm 2 that  $\mathbb{E}[x_{t-1}^\top (v_{2,t}^0 v_{1,t}^0 - v_{2,t} v_{1,t}) \lambda_{t-1}] = 0$ . By following the analysis of (EC.11), we have

$$\begin{aligned} \mathbb{E} \left[ \sum_{t=1}^K \tilde{\Lambda}_{2,t} \right] &= \sum_{t=1}^K \mathbb{E}[(x_t - x_{t-1})^\top (v_{2,t} v_{1,t} - v_{2,t}^0 v_{1,t}^0) \lambda_{t-1}] \\ &\leq \sum_{t=1}^K \mathbb{E} \left[ \frac{5 \|(v_{2,t}^0 v_{1,t}^0 - v_{2,t} v_{1,t}) \lambda_{t-1}\|^2}{2\eta} \right] + \sum_{t=1}^K \frac{\eta \mathbb{E}[\|x_t - x_{t-1}\|^2]}{10} \\ &\leq \sum_{t=1}^K \frac{5C_{g_1}^2 C_{g_2}^2 \mathbb{E}[\|\lambda_{t-1}\|^2]}{2\eta} + \sum_{t=1}^K \frac{\eta \mathbb{E}[\|x_t - x_{t-1}\|^2]}{10}, \end{aligned} \tag{EC.36}$$

where the last inequality uses the fact that  $\lambda_{t-1}$  and  $v_{2,t}^0 v_{1,t}^0 - v_{2,t} v_{1,t}$  are independent. Summing

(EC.33) over  $t = 1, 2, \dots, K$ , and combining (EC.34), (EC.35), and (EC.36), we obtain

$$\begin{aligned}
& \sum_{t=1}^K \mathbb{E} \left[ \mathcal{L}_F(x_t, \pi_{1,t}, \pi_{2,t}) - \mathcal{L}_F(x^*, \pi_{1,t}, \pi_{2,t}) + \lambda_t^\top \left( \mathcal{L}_G(x_t, v_t) - \mathcal{L}_G(x^*, v_t) \right) \right] \\
& \leq \frac{\eta}{2} \|x_0 - x^*\|^2 + \sum_{t=1}^K \left( \frac{\eta}{10} + \frac{\eta}{10} - \frac{\eta}{2} \right) \mathbb{E} \left[ \|x_{t-1} - x_t\|^2 \right] + \sum_{t=1}^K \frac{5C_{f_1}^2 C_{f_2}^2}{2\eta} \\
& \quad + \sum_{t=1}^K \frac{\alpha}{4} \mathbb{E} [\|\lambda_t - \lambda_{t-1}\|^2] + \sum_{t=1}^K \frac{D_X^2 C_{g_1}^2 C_{g_2}^2}{\alpha} + \sum_{t=1}^K \frac{5C_{g_1}^2 C_{g_2}^2 \mathbb{E} [\|\lambda_{t-1}\|^2]}{2\eta} \\
& = \frac{\eta}{2} \|x_0 - x^*\|^2 - \sum_{t=1}^K \frac{3\eta}{10} \mathbb{E} \left[ \|x_{t-1} - x_t\|^2 \right] + \sum_{t=1}^K \frac{5C_{f_1}^2 C_{f_2}^2}{2\eta} \\
& \quad + \sum_{t=1}^K \frac{\alpha}{4} \mathbb{E} [\|\lambda_t - \lambda_{t-1}\|^2] + \sum_{t=1}^K \frac{D_X^2 C_{g_1}^2 C_{g_2}^2}{\alpha} + \sum_{t=1}^K \frac{5C_{g_1}^2 C_{g_2}^2 \mathbb{E} [\|\lambda_{t-1}\|^2]}{2\eta}.
\end{aligned}$$

This completes the proof. ▀

### EC.2.3 Proof of Proposition 2

For the feasible point  $(x^*, \lambda, \pi_{1:2}, v_{1:2})$ , we set  $\pi_{1:2} = \pi_{1:2}^*$ ,  $v_{1:2} = v_{1:2}^*$ , and  $\lambda = \lambda^*$  as defined in (24). By applying Theorem 3 with  $M_{\lambda^*} = \|\lambda^*\|$ , we obtain

$$\begin{aligned}
& \sum_{t=1}^K \mathbb{E} \left( \mathcal{L}(x_t, \lambda^*, \pi_{1:2}^*, v_{1:2}^*) - \mathcal{L}(x^*, \lambda_t, \pi_{1:2,t}, v_{1:2,t}) \right) + \frac{\alpha}{2} \mathbb{E} [\|\lambda_K - \lambda^*\|^2] \\
& \leq \frac{40KC_{g_1}^2 C_{g_2}^2 \|\lambda^*\|}{\eta} + 2\sqrt{K}L_{g_1}\sigma_{g_2}^2 \|\lambda^*\| + 3\sqrt{K}C_{g_1}\sigma_{g_2} \|\lambda^*\| + \frac{\eta}{2} \|x_0 - x^*\|^2 \\
& \quad + \frac{95KC_{f_1}^2 C_{f_2}^2}{2\eta} + \frac{K}{\alpha} (D_X^2 C_{g_1}^2 C_{g_2}^2 + \sigma_H^2) + \frac{\alpha}{2} \|\lambda_0 - \lambda^*\|^2 + \sqrt{K} \|\lambda^*\| \sigma_H \\
& \quad + 2\sqrt{K}L_{f_1}\sigma_{f_2}^2 + 3\sqrt{K}C_{f_1}\sigma_{f_2} + \sum_{t=1}^K \frac{5C_{g_1}^2 C_{g_2}^2}{2\eta} \left( \mathbb{E} [\|\lambda^* - \lambda_t\|^2] + \mathbb{E} [\|\lambda_{t-1}\|^2] \right).
\end{aligned}$$

We note that  $\mathcal{L}(x_t, \lambda^*, \pi_{1:2}^*, v_{1:2}^*) - \mathcal{L}(x^*, \lambda_t, \pi_{1:2,t}, v_{1:2,t}) \geq 0$  by the definition of a saddle point (24). Thus, we have

$$\begin{aligned}
& \frac{\alpha}{2} \mathbb{E} [\|\lambda_K - \lambda^*\|^2] \\
& \leq \frac{40KC_{g_1}^2 C_{g_2}^2 \|\lambda^*\|}{\eta} + \frac{\eta}{2} \|x_0 - x^*\|^2 + \frac{95KC_{f_1}^2 C_{f_2}^2}{2\eta} + \frac{K}{\alpha} (D_X^2 C_{g_1}^2 C_{g_2}^2 + \sigma_H^2) \\
& \quad + \frac{\alpha}{2} \|\lambda_0 - \lambda^*\|^2 + \sum_{t=1}^K \frac{5C_{g_1}^2 C_{g_2}^2}{2\eta} \left( \mathbb{E} [\|\lambda^* - \lambda_t\|^2] + \mathbb{E} [\|\lambda_{t-1}\|^2] \right) + \sqrt{K}Q,
\end{aligned}$$

where  $Q = 2L_{g_1}\sigma_{g_2}^2 \|\lambda^*\| + 3C_{g_1}\sigma_{g_2} \|\lambda^*\| + \|\lambda^*\| \sigma_H + 2L_{f_1}\sigma_{f_2}^2 + 3C_{f_1}\sigma_{f_2}$  is defined in (29). By using the fact that  $\|\lambda_t\|^2 \leq 2\|\lambda_t - \lambda^*\|^2 + 2\|\lambda^*\|^2$ , setting  $\alpha = 2\sqrt{N}$  and  $\eta = \frac{15C_{g_1}^2 C_{g_2}^2 \sqrt{N}}{2}$ , and dividing

both sides of the above inequality by  $\sqrt{N}$ , we obtain

$$\begin{aligned}
& \mathbb{E}[\|\lambda_K - \lambda^*\|^2] \\
& \leq \frac{16K\|\lambda^*\|}{3N} + \frac{15C_{g_1}^2 C_{g_2}^2}{4} \|x_0 - x^*\|^2 + \frac{19KC_{f_1}^2 C_{f_2}^2}{3C_{g_1}^2 C_{g_2}^2 N} + \frac{K}{2N} (D_X^2 C_{g_1}^2 C_{g_2}^2 + \sigma_H^2) \\
& \quad + \|\lambda_0 - \lambda^*\|^2 + \frac{1}{3N} \sum_{t=1}^K \left( \mathbb{E}[\|\lambda^* - \lambda_t\|^2] + 2\mathbb{E}[\|\lambda_{t-1} - \lambda^*\|^2] + 2\|\lambda^*\|^2 \right) + \frac{\sqrt{K}Q}{\sqrt{N}} \\
& = R_K + \frac{1}{3N} \mathbb{E}[\|\lambda^* - \lambda_K\|^2] + \frac{1}{N} \sum_{t=1}^K \mathbb{E}[\|\lambda_{t-1} - \lambda^*\|^2],
\end{aligned}$$

where

$$R_K = \frac{K}{N} \left( 6\|\lambda^*\| + \frac{7C_{f_1}^2 C_{f_2}^2}{C_{g_1}^2 C_{g_2}^2} + \frac{D_X^2 C_{g_1}^2 C_{g_2}^2 + \sigma_H^2}{2} \right) + \frac{15C_{g_1}^2 C_{g_2}^2}{4} \|x_0 - x^*\|^2 + \|\lambda_0 - \lambda^*\|^2 + \frac{\sqrt{K}Q}{\sqrt{N}}.$$

By noting that  $R_K \leq R$  defined in (29), the above inequality further implies that

$$\left(1 - \frac{1}{3N}\right) \mathbb{E}[\|\lambda_K - \lambda^*\|^2] \leq R + \sum_{t=1}^K \frac{\mathbb{E}[\|\lambda_{t-1} - \lambda^*\|^2]}{N}.$$

Assuming  $N \geq 2$ , for all  $K \leq N$ , we have

$$\mathbb{E}[\|\lambda_K - \lambda^*\|^2] \leq 2R + \sum_{t=0}^{K-1} \frac{2}{N} \cdot \mathbb{E}[\|\lambda_t - \lambda^*\|^2].$$

Finally, by applying Lemma 1, we recursively bound  $\mathbb{E}[\|\lambda_K - \lambda^*\|^2]$  by

$$\mathbb{E}[\|\lambda_K - \lambda^*\|^2] \leq 2Re^2$$

for all  $K \leq N$ , which completes the proof. ■

#### EC.2.4 Proof of Theorem 4

We set  $\lambda_0 = 0$  throughout our analysis. We first consider the objective optimality gap  $F(\bar{x}_N) - F(x^*)$ . We denote by

$$\hat{\pi}_2 \in \partial f_2(\bar{x}_N), \hat{\pi}_1 = \nabla f_1(f_2(\bar{x}_N)), \hat{v}_2 \in \partial g_2(\bar{x}_N), \text{ and } \hat{v}_1 = \nabla g_1(g_2(\bar{x}_N)).$$

Setting the feasible point as  $(x^*, 0, \hat{\pi}_{1:2}, \hat{v}_{1:2})$  and following Theorem 2 with  $M_\lambda = 0$  for  $\lambda = 0$ ,  $\alpha_t = 2\sqrt{N}$ , and  $\eta_t = \frac{15C_{g_1}^2 C_{g_2}^2 \sqrt{N}}{2}$ , we obtain that

$$\begin{aligned}
\mathbb{E}[F(\bar{x}_N)] - F(x^*) & \leq \frac{1}{N} \sum_{t=1}^N \mathbb{E} \left( \mathcal{L}(x_t, 0, \hat{\pi}_{1:2}, \hat{v}_{1:2}) - \mathcal{L}(x^*, \lambda_t, \pi_{1:2,t}, v_{1:2,t}) \right) \\
& \leq \frac{1}{\sqrt{N}} \left( \frac{15C_{g_1}^2 C_{g_2}^2}{4} \|x_0 - x^*\|^2 + \frac{7C_{f_1}^2 C_{f_2}^2}{C_{g_1}^2 C_{g_2}^2} + \frac{D_X^2 C_{g_1}^2 C_{g_2}^2 + \sigma_H^2}{2} + 2L_{f_1} \sigma_{f_2}^2 + 3C_{f_1} \sigma_{f_2} \right) \\
& \quad + \frac{1}{N} \sum_{t=1}^N \frac{1}{3\sqrt{N}} \left( \mathbb{E}[\|\lambda_t\|^2] + \mathbb{E}[\|\lambda_{t-1}\|^2] \right).
\end{aligned}$$

We then derive the convergence rate of the optimality gap by the bound of  $\|\lambda_t\|^2$  in Proposition 2 that

$$\mathbb{E}[\|\lambda_t\|^2] \leq 2\|\lambda^*\|^2 + 2\mathbb{E}[\|\lambda_t - \lambda^*\|^2] \leq 2\|\lambda^*\|^2 + 2Re^2, \text{ for all } t = 1, 2, \dots, N.$$

Second, we consider the feasibility residual  $G(\bar{x}_N)_+$ . By adopting the feasible point  $(x^*, \tilde{\lambda}, \hat{\pi}_{1:2}, \hat{v}_{1:2})$  where  $\tilde{\lambda} = (\lambda^* + 1) \frac{G(\bar{x}_N)_+}{\|G(\bar{x}_N)_+\|_2}$  and following Theorem 2 with  $M_{\tilde{\lambda}} = \|\tilde{\lambda}\|$ ,  $\alpha_t = 2\sqrt{N}$ , and  $\eta_t = \frac{15C_{g_1}^2 C_{g_2}^2 \sqrt{N}}{2}$ , we obtain

$$\begin{aligned} \mathbb{E}[\|G(\bar{x}_N)_+\|_2] &\leq \frac{1}{N} \sum_{t=1}^N \mathbb{E} \left( \mathcal{L}(x_t, \tilde{\lambda}, \hat{\pi}_{1:2}, \hat{v}_{1:2}) - \mathcal{L}(x^*, \lambda_t, \pi_{1:2,t}, v_{1:2,t}) \right) \\ &\leq \frac{1}{\sqrt{N}} \left( \frac{16\|\tilde{\lambda}\|^2}{3} + 2L_{g_1} \sigma_{g_2}^2 \|\tilde{\lambda}\| + 3\sqrt{K} C_{g_1} \sigma_{g_2} \|\tilde{\lambda}\| + \frac{15C_{g_1}^2 C_{g_2}^2}{4} \|x_0 - x^*\|^2 \right) \\ &\quad + \frac{1}{\sqrt{N}} \left( \frac{7C_{f_1}^2 C_{f_2}^2}{C_{g_1}^2 C_{g_2}^2} + \frac{D_X^2 C_{g_1}^2 C_{g_2}^2 + \sigma_H^2}{2} + \|\tilde{\lambda}\|^2 + \sigma_H \|\tilde{\lambda}\| + 2L_{f_1} \sigma_{f_2}^2 + 3C_{f_1} \sigma_{f_2} \right) \\ &\quad + \frac{1}{N} \sum_{t=1}^N \frac{1}{3\sqrt{N}} \left( \mathbb{E}[\|\tilde{\lambda} - \lambda_t\|^2] + \mathbb{E}[\|\lambda_{t-1}\|^2] \right). \end{aligned}$$

We obtain the convergence rate of feasibility residual  $\|G(x)_+\|_2$  by using the facts that

$$\|\lambda_t\|^2 \leq 2\|\lambda^*\|^2 + 2\|\lambda_t - \lambda^*\|^2 \text{ and } \|\tilde{\lambda} - \lambda_t\|^2 \leq 3\|\tilde{\lambda}\|^2 + 3\|\lambda^*\|^2 + 3\|\lambda_t - \lambda^*\|^2,$$

and applying  $\mathbb{E}[\|\lambda_t - \lambda^*\|^2] \leq 2Re^2$  provided by Proposition 2. This completes the proof.  $\blacksquare$

## References

- Lan G (2020) *First-order and Stochastic Optimization Methods for Machine Learning* (Springer Nature).  
 Zhang Z, Lan G (2024) Optimal methods for convex nested stochastic composite optimization. *Mathematical Programming* 1–48.
